# **Modulation of Transient receptor potential melastatin 3 by protons through its intracellular binding sites**

Md Zubayer Hossain Saad <sup>1,2,#</sup>, Liuruimin Xiang <sup>1,2,#</sup>, Yan-Shin Liao <sup>3</sup>, Leah R. Reznikov <sup>3</sup>,  
Jianyang Du<sup>1,2,4,\*</sup>

<sup>1</sup> Department of Anatomy and Neurobiology, University of Tennessee Health Science Center, Memphis, TN 38163, USA.

<sup>2</sup> Department of Biological Sciences, University of Toledo, Toledo, OH 43606, USA.

<sup>3</sup> Department of Physiological Sciences, University of Florida, Gainesville, FL 32610, USA.

<sup>4</sup> Neuroscience Institute, University of Tennessee Health Science Center, Memphis, TN 38163, USA.

# These authors contributed equally to this work

## **Correspondence**

Jianyang Du, Tel: 901-448-3463, Email: [jdu15@uthsc.edu](mailto:jdu15@uthsc.edu)

**Running Title:** Intracellular acidic pH inhibits TRPM3.

1 **Abstract**

2 Transient receptor potential melastatin 3 channel (TRPM3) is a calcium-permeable  
3 nonselective cation channel that plays an important role in modulating glucose homeostasis  
4 in the pancreatic beta cells. However, how TRPM3 is regulated under physiological and  
5 pathological conditions is poorly understood. In this study, we found that both intracellular  
6 and extracellular protons block TRPM3 through its intracellular binding sites. We  
7 demonstrated that external protons indirectly block TRPM3, whereas internal protons  
8 inhibit TRPM3 directly with an inhibitory  $pH_{50}$  of  $6.9 \pm 0.11$ . We identified three titratable  
9 residues, D1059, D1062, and D1073, at the inner vestibule of the channel pore that  
10 contribute to pH sensitivity. The mutation of D1073Q reduces TRPM3 current intensity  
11 and pH sensitivity; Replacement of Asp 1073 by Gln 1073 changes the reduction of  
12 TRPM3 outward current by low external pH 5.5, from  $62 \pm 3 \%$  in WT to  $25 \pm 6.0 \%$  in  
13 D1073Q. These results indicate that D1073 is not only essential for intracellular pH  
14 sensitivity, but it is also crucial for TRPM3 channel gating. In addition, a single mutation  
15 of D1059 or D1062 enhances pH sensitivity. In summary, our findings provide a novel  
16 molecular determinant for pH regulation of TRPM3. The inhibition of TRPM3 by protons  
17 may indicate an endogenous mechanism governing TRPM3 gating and its physiological/  
18 pathological functions.

19

20 **Keywords:** TRP channels, TRPM3, protons, Pregnenolone Sulfate, Site-directed  
21 Mutagenesis, extracellular low pH, intracellular low pH, pH sensitivity.

22

23

## 24 **Introduction**

25 Transient receptor potential channels (TRP channels) are membrane proteins that facilitate  
26 the interpretation of external stimuli, and allow organisms to readily sense the environment  
27 (Clapham 2003). These stimuli include temperature (Vandewauw et al. 2018; Brauchi and  
28 Orio 2011), voltage (Clapham 2003; Brauchi and Orio 2011; Montell et al. 1985),  
29 mechanical force (osmolarity (Strotmann et al. 2000; Liedtke and Friedman 2003; Quallo  
30 et al. 2015), pressure (Suzuki et al. 2003), stretch (Strotmann et al. 2000; Hardie and Franze  
31 2012; Maroto et al. 2005), gravity (Sun et al. 2009)), light (Montell et al. 1985; Minke  
32 1977; Hardie 2014), proton concentration (Gerdes et al. 2007; Chandrashekar et al. 2006;  
33 Semtner et al. 2007), and various chemical signals (Caterina et al. 1997; McKemy,  
34 Neuhauser, and Julius 2002; Everaerts et al. 2011). TRP channels form homomeric or  
35 heteromeric cation channels that can be selective or non-selective to cations; and most of  
36 the TRP members are permeable to  $\text{Ca}^{2+}$  (Pan, Yang, and Reinach 2011). Upon activation,  
37 TRP channels change membrane potential or intracellular calcium concentration ( $[\text{Ca}^{2+}]_i$ )  
38 to promote downstream signal transductions. Depending on sequence homology and  
39 channel architecture, TRP channels are divided into seven subfamilies, namely, TRPA  
40 (Ankyrin), TRPC (Canonical), TRPM (Melastatin), TRPML (Mucolipin), TRPP  
41 (Polycystin), TRPV (Vanilloid), and TRPN (NompC, no vertebrate member). 27 vertebrate  
42 members of these subfamilies are expressed in humans (Venkatachalam and Montell 2007;  
43 Uchida et al. 2019).

44 TRPM3 belongs to the subfamily of TRPM (Melastatin). TRPM3 is a non-selective  
45 cation channel that is permeable to  $\text{Ca}^{2+}$ ,  $\text{Na}^+$ ,  $\text{Mn}^{2+}$  and  $\text{Mg}^{2+}$  ions with a permeability ratio  
46 of  $P_{\text{Ca}}/P_{\text{Na}}$  of  $1.57 \pm 0.31$  (Grimm et al. 2003). RT-qPCR analyses have shown expression

47 of human (hTRPM3), mouse (mTRPM3) and rat (rTRPM3) TRPM3 in a variety of tissues,  
48 with the most abundant expression in the brain, kidney, pituitary gland and adipose tissues  
49 (Oberwinkler and Philipp 2014; Zamudio-Bulcock et al. 2011). In sensory neurons,  
50 TRPM3 functions as a noxious heat sensor; TRPM3 deficient mice lack the normal  
51 response to noxious heat and do not develop inflammatory heat hyperalgesia (Vandewauw  
52 et al. 2018; Vriens et al. 2011). Vangeel et al. recently demonstrated functional expression  
53 of TRPM3 in human sensory neurons; where a large subset of nociceptor neurons express  
54 TRPM3, and TRPM3 has been suggested to be a potential drug target for novel analgesics  
55 (Vangeel et al. 2020; Moran and Szallasi 2018). Although, role of TRPM3 in central  
56 nervous system has not been explored in detail yet, a recent study has shown high-level  
57 expression of TRPM3 in mouse CA2 and CA3 hippocampal neurons and in the dentate  
58 gyrus. Field potential recordings also showed that TRPM3 agonists inhibit synaptic  
59 transmission and plasticity, and reduce long-term potentiation (LTP) in mouse  
60 hippocampus (Held et al. 2020). Moreover, human genetic analyses have linked TRPM3  
61 mutations with intellectual disability, epilepsy, inherited cataract and glaucoma (Dyment  
62 et al. 2019; Bennett et al. 2014). In cardiovascular system, TRPM3 localizes in the  
63 perivascular nerves of mouse mesenteric arteries, and induces vasodilation by stimulating  
64 CGRP (calcitonin gene-related peptide) receptors (Alonso-Carbajo et al. 2019). TRPM3  
65 forms homomultimeric channels, which are constitutively active (Grimm et al. 2003). In  
66 addition, TRPM3 channel can also be activated by endogenous neurosteroid pregnenolone  
67 sulfate (PS), nifedipine, and clotrimazole. Mefenamic acid, diclofenac, progesterone and  
68 favanones have been reported to inhibit TRPM3 (Wagner et al. 2008; Uchida et al. 2019).  
69 PS has been shown to increase neurotransmitter release, strengthen synaptic transmission

70 and modulate synaptic plasticity (Smith, Gibbs, and Farb 2014). However, whether  
71 TRPM3 contribute to any of these neuronal functions of PS or not, is not clear (Zamudio-  
72 Bulcock et al. 2011). One study has shown that PS-induced potentiation of spontaneous  
73 glutamate release in Purkinje neurons of developing rats is mediated by TRPM3 (Zamudio-  
74 Bulcock et al. 2011). In non-neuronal cells, PS upregulates activator protein 1 (AP-1) and  
75 early growth response protein 1 (Egr-1) transcriptional activity, which can be blocked by  
76 TRPM3 antagonists (Lesch, Rubil, and Thiel 2014). TRPM3 also upregulates c-Jun and c-  
77 Fos promoter activity and stimulates CRE-controlled reporter gene transcription in  
78 insulinoma and pancreatic  $\beta$ -cells, in a TRPM3-dependent manner (Muller, Rossler, and  
79 Thiel 2011). In vascular smooth muscle cells, PS increases  $[Ca^{2+}]_i$  and modulates  
80 contractile responses, which can be inhibited by TRPM3 inhibitors (Naylor et al. 2010).  
81 PS also increases  $[Ca^{2+}]_i$  in fibroblast-like synoviocytes and suppresses the secretion of  
82 hyaluronan via TRPM3 (Ciurtin et al. 2010).

83 Extracellular and intracellular protons modulate ion channel activity. For example,  
84 extracellular acidification activates acid-sensing ion channels (ASICs), G-protein coupled  
85 inward rectifier  $K^+$  channels, nifedipine sensitive L-type  $Ca^{2+}$  channels, and acid-sensitive  
86  $Cl^-$  channels; while inhibiting two-pore domain  $K^+$  channels (TASK-1, TASK-2, TASK-3,  
87 TALK-1, and TALK-2), and reducing potency of ionotropic purinoceptors - P2X1, P2X3,  
88 P2X4 and P2X7. Intracellular acidosis activates inward rectifier  $K^+$  channel family protein  
89 Kir6.1, K2p channel TREK-1 and TREK-2; however, Kir1.1, Kir4.1, and Kir5.1 activity  
90 is inhibited by both intracellular and extracellular decreases in pH. Gap junction channels,  
91 connexins, are also inhibited by intracellular acidosis. In addition, both intracellular and  
92 extracellular acidification block the K2p channel TRESK, as well as depress or inhibit

93 TWIK-1 and TWIK-2. Some of the ion channels, such as, TASK-2, TRESK, TALK-1, and  
94 TALK-2, which are blocked at low pH can be activated or gated open by alkalization.  
95 Protons cannot activate or inhibit P2X2 and P2X5 homomultimers but decreases potency  
96 and efficacy of ATP gating of P2X5, and sensitizes P2X2 receptors to ATP. To make things  
97 even complex, protons can have a variable effect depending on the subunit composition of  
98 heteromeric ion channels (Holzer 2009). TRP channels are no exception regarding variable  
99 activity in response to pH. Specifically, TRPV1, TRPV4, and TRPC4 are activated by a  
100 reduction of pH. In contrast, TRPC5 currents are increased by an acidic pH until 6.0 is  
101 reached, at which point further decreases in pH reduce current (Holzer 2009). PKD2L1  
102 (TRPP2) expressing neurons show action potentials in response to citric acid (Huang et al.  
103 2006), whereas intracellular and extracellular pH inhibits TRPM2 (Du, Xie, and Yue  
104 2009). Yet very little is known about how pH regulates TRPM3. Thus, to understand the  
105 role of pH on TRPM3 activity, we studied how TRPM3 activation by PS responds to  
106 different extracellular and intracellular pH conditions. In all experiments, we activated  
107 TRPM3 by external application of PS, and all subsequent mentions of TRPM3 activity in  
108 this manuscript must be considered as TRPM3 activity in response to PS, and not TRPM3  
109 constitutive activity. As PS induced TRPM3 currents are almost two orders of magnitude  
110 higher than TRPM3 constitutive currents (Wagner et al. 2008; Grimm et al. 2003; Lee et  
111 al. 2003), we concluded that for our experiments, it is reasonable to exclude the effects of  
112 constitutive TRPM3 activity.

113

114

115

## 116 **Materials & Methods**

### 117 **Plasmid and molecular biology**

118 The cDNA of human TRPM3 channel (accession number AJ505026) with C-terminal GFP  
119 tag was provided by C. Harteneck (University of Tübingen, Tübingen, Germany) (Grimm  
120 et al. 2003). Alternative splicing patterns of TRPM3 is highly conserved across human and  
121 rodents (Oberwinkler et al. 2005). To date, 25 isoforms of mTRPM3 protein have been  
122 identified, including a recently discovered variant - TRPM3 $\gamma$ 3. Splicing events affect exons  
123 8, 13, 15, 17, 20, 24 and 28 of TRPM3.  $\alpha$  variants lack exon 2,  $\beta$  variants lack exon 1, and  
124  $\gamma$  variants lack a large part of exon 28 (Uchida et al. 2019; Oberwinkler and Philipp 2014).  
125 Our hTRPM3 cDNA contains all 30 exons, where 389 amino acids in exon 28 has been  
126 replaced with alternative carboxy terminus of 7 residues; this truncation does not affect any  
127 functional activity of the ion channel (Oberwinkler and Philipp 2014; Grimm et al. 2003).  
128 Mutations of hTRPM3-GFP were generated by site-directed mutagenesis (performed by  
129 GENEWIZ Inc). The predicted mutations were verified by sequencing analysis.

130

### 131 **Cell culture and overexpression of hTRPM3-GFP and the mutants in HEK-293 cells.**

132 Human embryonic kidney (HEK) 293 cells were used to transiently overexpress wild-type  
133 hTRPM3-GFP and its mutants. The cells were grown in DMEM/F12 medium (Fisher  
134 Scientific, catalog no. MT10090CV) supplemented with 10% bovine growth serum  
135 (HyClone, catalog no. SH30541.03), 100 U/ml penicillin / 100 mg/ml streptomycin (Fisher  
136 Scientific, catalog no. SV30010) at 37°C in a 5% CO<sub>2</sub>- controlled, humidity-controlled  
137 incubator. Lipofectamine 2000 (Thermo Fisher Scientific, catalog no. 18324012) was used  
138 for the transfection of TRPM3 into the cells in a 35-mm culture dish according to the

139 manufacturer's instructions. Successfully transfected cells were identified by their fused  
140 GFP when illuminated at 480 nm excitation wavelength. Electrophysiological recordings  
141 were conducted between 36- and 48-hours post-transfection.

142

### 143 **Electrophysiology**

144 All patch-clamp experiments were performed at room temperature (20–22°C). TRPM3  
145 whole-cell currents were recorded using an Axopatch 200B amplifier. Data were digitized  
146 at 10 kHz and digitally filtered offline at 5 kHz. Patch electrodes were pulled by Sutter P-  
147 97 micropipette puller and fire-polished to resistance of 3-5 MΩ when filled with internal  
148 solutions. Series resistance (Rs) was compensated up to 90% to reduce series resistance  
149 errors to <5 mV. Cells in which Rs was >8 MΩ were discarded (Du, Xie, and Yue 2009).  
150 For whole-cell current recording, ramp voltage stimuli (250 ms duration) were delivered  
151 at 1-second intervals and the ranging from –100 to +100 mV. The internal pipette solution  
152 for whole-cell current recordings contained (in mM): 115 Cs-methanesulfonate  
153 (CsSO<sub>3</sub>CH<sub>3</sub>), 8 NaCl, 10 Cs-EGTA, 5 Na<sub>2</sub>-ATP and 10 HEPES, with pH adjusted to 7.2  
154 with CsOH. In high intracellular Ca<sup>2+</sup> experiments, 0.93 mM CaCl<sub>2</sub> was added to the  
155 above-mentioned intracellular solution and EGTA was reduced to 1 mM, resulting in 1 μM  
156 free intracellular Ca<sup>2+</sup>. MaxChelator ([https://somapp.ucdmc.ucdavis.edu/ pharmacology/](https://somapp.ucdmc.ucdavis.edu/pharmacology/bers/maxchelator/downloads.htm)  
157 [bers/maxchelator/downloads.htm](https://somapp.ucdmc.ucdavis.edu/pharmacology/bers/maxchelator/downloads.htm)) software from the University of California, Davis was  
158 used to calculate free [Ca<sup>2+</sup>]<sub>i</sub>.

159 To avoid proton activated chloride currents conducted by endogenous anion channels of  
160 HEK-293 cells (Lambert and Oberwinkler 2005), NaCl in standard Tyrode solution was  
161 replaced with Na-glutamate for all whole-cell current recordings. This external solution



162 contained (in mM): 145 Na-glutamate, 5 KCl, 2 CaCl<sub>2</sub>, 1 MgCl<sub>2</sub>, 10 HEPES, and 10  
163 glucose, with pH adjusted to 7.4 with glutamic acid. Internal and external acidic pH  
164 solutions were prepared as described previously with slight modifications (Du, Xie, and  
165 Yue 2009). In brief, 10 mM HEPES used in the solutions at pH 7.4 and 7.0 was replaced  
166 by 10 mM MES for the solutions at pH ≤ 6.0. Bath solutions containing 1 mM to 60 mM  
167 NH<sub>4</sub>Cl were prepared by decreasing Na<sup>+</sup> concentrations to 85 mM in the solution to keep  
168 the osmolarity constant, and osmolarity was adjusted to 300 ± 10 mOsm with mannitol. In  
169 experiments designed to test protons permeability of TRPM3, pipette solutions contained  
170 (in mM): 120 NMDG, 108 glutamic acid, 10 HEPES, 10 EGTA, with pH adjusted to 7.2  
171 with NMDG. External solutions for proton permeability test contained (in mM): 145  
172 NMDG, 10 HEPES and 10 Glucose; and pH was adjusted with glutamic acid. To prepare  
173 the pH 5.5 external solution for proton permeability, 10 mM HEPES was replaced with 10  
174 mM MES. PS was dissolved in DMSO to prepare 100 mM stock solution, and adequate  
175 volume of stock PS solution was added to the external solution to achieve required  
176 concentration. All the chemicals used in electrophysiological experiments were from  
177 Sigma-Aldrich.

178

### 179 **Data analysis**

180 Statistical data were analyzed using GraphPad Prism 8. Pooled data are presented as mean  
181 ± SEM. Concentration-response curves were fitted by an equation of the form:  $E =$   
182  $E_{max}\{1/[1+(IC_{50}/C)^n]\}$  where  $E$  is the effect at concentration  $C$ ,  $E_{max}$  is the maximal effect,  
183  $IC_{50}$  is the concentration for half-maximal effect, and  $n$  is the Hill coefficient (Du, Xie, and  
184 Yue 2009). Concentration of proton required for half-maximal inhibition is denoted by  $IC_{50}$

185 (when  $H^+$  concentration is expressed as molar concentration) and  $pH_{50}$  (when  $H^+$   
186 concentration is expressed by pH value). Statistical comparison of two groups was  
187 performed by unpaired Student's t-test,  $p < 0.05$  was considered statistically significant.  
188 Statistical comparison of three or more groups was performed by one-way ANOVA with  
189 Tukey's post hoc multiple comparison.

190

## 191 **Results**

### 192 **Extracellular and intracellular acidic pH inhibit TRPM3**

193 We studied the effects of low pH on TRPM3 by overexpressing hTRPM3-GFP in HEK-  
194 293 cells and recording whole-cell currents in response to PS. We found that low  
195 extracellular pH inhibits TRPM3, in a reversible manner (Fig. 1, A - D). To avoid proton  
196 activated endogenous anion channel conducted chloride currents, external  $Cl^-$  was replaced  
197 by glutamate (See Methods). Inhibitory effect of low extracellular pH ( $pH_o$ ) was only  
198 observed below pH 6.0. Specifically, at  $pH_o$  7.0 and 6.0, recorded TRPM3 currents were  
199 equivalent to  $pH_o$  7.4 ( $p > 0.05$  in both groups). At a  $pH_o$  below 6.0, acidic conditions  
200 exhibited significant inhibition of TRPM3 (Fig. 1).  $pH_o$  5.5, caused ~ 60% reduction in  
201 TRPM3 whole-cell current induced by PS. Fitting these data in a non-linear regression  
202 curve did not result in a well-fitted curve; we did not observe a concentration-dependent  
203 effect of extracellular pH on TRPM3 activity. This might suggest an indirect inhibition of  
204 TRPM3 by low  $pH_o$ . In addition, as shown in Fig. 1A, application of low extracellular pH  
205 ( $pH \leq 5.5$ ) with PS produced an initial activation of TRPM3 before blocking it. This  
206 suggested that the onset of low  $pH_o$  inhibition is slower than the PS activation, supporting  
207 the hypothesis that the inhibition of TRPM3 by low  $pH_o$  is indirect. We thus hypothesized

208 that protons block TRPM3 by permeating through TRPM3 and binding on a cytoplasmic  
209 site. To test this hypothesis, we first investigated the effects of intracellular low pH ( $\text{pH}_i$ )  
210 on TRPM3. Whole-cell TRPM3 currents were recorded using the low-pH pipette solutions  
211 (see experimental procedures), while keeping extracellular pH constant at 7.4 (Fig. 2). Low  
212  $\text{pH}_i$  markedly reduced TRPM3 current in a concentration-dependent manner with a  $\text{pH}_{50}$   
213 value of  $6.90 \pm 0.11$  (outward current at +100mV) (Fig. 2C) and  $\text{pH}_{50}$  value of  $6.90 \pm 0.15$   
214 (inward current at -100mV) (Fig. 2D). There was no significant difference in the steady-  
215 state inhibition between inward and outward currents, concluding that there are no voltage-  
216 dependent effects of acidic  $\text{pH}_i$  on inward and outward TRPM3 currents (Fig. 2, C and D).  
217 To investigate the extent of modulation of TRPM3 by protons, we also introduced higher  
218  $\text{pH}_i$  than the physiological  $\text{pH}_i$  of 7.2. Recorded TRPM3 current plateaued at about  $\text{pH}_i$  7.6.  
219 Protons had similar inhibitory effects on both outward and inward TRPM3 currents (Fig.  
220 2, A and B). Combined, our findings that  $\text{pH}_o$  6.0 did not affect TRPM3 current but low  
221  $\text{pH}_i$  had an inhibitory  $\text{pH}_{50}$  value of 6.9, suggested a higher pH sensitivity of TRPM3 in the  
222 cytoplasmic side.

223

#### 224 **Effect of low $\text{pH}_i$ on concentration-dependence of TRPM3 activation by PS**

225 PS binds directly to the extracellular side of the TRPM3 channel to activate it. TRPM3  
226 channel stays both functional and unaffected by the presence of intracellular PS (Wagner  
227 et al. 2008). Previous studies have shown that PS activates TRPM3 in a concentration-  
228 dependent manner with an  $\text{EC}_{50}$  value of 12  $\mu\text{M}$  and 23  $\mu\text{M}$  for outward and inward current  
229 respectively (Wagner et al. 2008). To investigate the effect of protons on PS concentration-  
230 dependence of TRPM3, we perfused the cells with a wide range of PS concentrations (1

231  $\mu\text{M}$  - 500  $\mu\text{M}$ ), while keeping  $\text{pH}_i$  constant at 7.2 or 6.0. TRPM3 whole-cell outward and  
232 inward currents showed very similar PS concentration-dependence in both  $\text{pH}_i$  conditions  
233 (Fig. 3).  $\text{EC}_{50}$  values for outward currents were 16  $\mu\text{M}$  ( $\text{pH}_i$  7.2) and 15  $\mu\text{M}$  ( $\text{pH}_i$  6.0) (Fig.  
234 3D), and for inward currents were 21  $\mu\text{M}$  ( $\text{pH}_i$  7.2) and 26  $\mu\text{M}$  ( $\text{pH}_i$  6.0) (Fig. 3F). All  
235 concentration-dependent curves plateaued after 50  $\mu\text{M}$  PS stimulations (Fig. 3). We  
236 observed a downward shift of the outward current ratio curve in response to low  $\text{pH}_i$  (Fig.  
237 3C). However, when currents were normalized to the maximum TRPM3 activation by 500  
238  $\mu\text{M}$  PS, the outward current curve did not deviate in response to low  $\text{pH}_i$  (Fig. 3D). These  
239 results indicate that higher proton concentration inside the cell reduces TRPM3 maximal  
240 activation potential at any given PS concentration but does not affect PS concentration-  
241 dependent activation of TRPM3. The PS concentration-dependent curve of TRPM3 inward  
242 currents did not show any change in response to low  $\text{pH}_i$  (Fig. 3, E and F). In summary,  
243 these data suggest that intracellular protons do not compete with PS for binding sites.

244

#### 245 **TRPM3 inhibition by protons can be reversed by increasing $\text{pH}_i$**

246 Extracellular application of  $\text{NH}_4\text{Cl}$  produces a rise in  $\text{pH}_i$  resulting from an influx of  $\text{NH}_3$ .  
247  $\text{NH}_3$  binds intracellular protons and causes alkalization inside the cells (Jacobs 1922;  
248 Warburg 1922). We observed that protons blocked TRPM3 from the cytoplasmic side,  
249 thus we tested whether raising  $\text{pH}_i$  by applying  $\text{NH}_4\text{Cl}$  could rescue the TRPM3 current.  
250 We perfused the cells with solutions where part of  $\text{NaCl}$  was replaced by an equal amount  
251 of  $\text{NH}_4\text{Cl}$  (see experimental procedures), to test whether increasing  $\text{pH}_i$  while keeping  
252 extracellular pH the same can reverse the blocking effects of protons on TRPM3. As shown  
253 in Fig. 4, A and B, 30mM  $\text{NH}_4\text{Cl}$  increased recorded TRPM3 currents significantly. We

254 attribute this increase to the influx of  $\text{NH}_3$  into the cell and removing bound protons from  
255 the TRPM3 cytoplasmic side. Overall, this result substantiates our finding that TRPM3 is  
256 blocked by protons binding to an intracellular site. Different concentrations of  $\text{NH}_4\text{Cl}$  were  
257 applied to the same cell, and all  $\text{NH}_4\text{Cl}$  applications change intracellular pH. To confirm  
258 that every TRPM3 stimulation starts at the same initial  $\text{pH}_i$ , we allowed adequate washing  
259 time between two consecutive  $\text{NH}_4\text{Cl}$  + PS applications.

260 Subsequently, we wanted to test whether external  $\text{NH}_4\text{Cl}$  exhibits a concentration  
261 dependent rescuing effect on TRPM3 activity or not. We perfused hTRPM3-GFP  
262 overexpressed HEK-293 cells with modified Tyrode solutions containing different  
263 concentrations of  $\text{NH}_4\text{Cl}$  (1 - 60 mM).  $\text{Na}^+$  concentrations in all solutions were kept the  
264 same, and osmolarities were adjusted to  $300 \pm 10$  mOSM with Mannitol. We observed a  
265 5-fold increase in TRPM3 activity at only 3 mM ( $\text{NH}_4\text{Cl}$ ) concentration. Even 1 mM  
266  $\text{NH}_4\text{Cl}$  rescued some TRPM3 activity ( $p < 0.05$ ).  $\text{NH}_4\text{Cl}$  concentrations higher than 3 mM  
267 had higher impact on TRPM3 activity than 3 mM  $\text{NH}_4\text{Cl}$ . Although, when compared with  
268 3 mM  $\text{NH}_4\text{Cl}$ , some of these higher concentrations showed significant increase in TRPM3  
269 activity, there were no substantial increase in TRPM3 activity by further increase in  $\text{NH}_4\text{Cl}$   
270 concentration. This data indicates that TRPM3 activity is highly sensitive to intracellular  
271 pH changes, at least at the intracellular pHs over 6.0. It is noteworthy that we did not  
272 measure exact  $\text{pH}_i$  changes following external  $\text{NH}_4\text{Cl}$  applications, so the  $\text{pH}_i$  differences,  
273 before and after  $\text{NH}_4\text{Cl}$  applications, are unknown here. However, these experiments still  
274 substantiate our claim that TRPM3 activity is highly sensitive to intracellular pH changes,  
275 at least at physiological  $\text{pH}_i$  ranges ( $\text{pH}_i$  6.0 to 8.0). In this experiment, TRPM3 current  
276 recordings from each cell spanned over 20 minutes period. To confirm that subsequent

277 application of NH<sub>4</sub>Cl and PS for a long time does not affect TRPM3 activity, we also tested  
278 individual cells with only one exposure to NH<sub>4</sub>Cl, at different concentrations. The results  
279 of these experiments are summarized in Supplementary Fig. 1 (sFig. 1). When compared  
280 with TRPM3 currents from our earlier experiments (Fig. 4, D), where the same cells were  
281 perfused with different concentrations of NH<sub>4</sub>Cl, individual cells did not show a difference  
282 (sFig. 1B). We also observed a higher increase in inward current than corresponding the  
283 outward current (Fig. 4, I). The ratio of inward current to outward current increased from  
284 0.13 at 1mM NH<sub>4</sub>Cl to 0.54 at 60mM NH<sub>4</sub>Cl. This increase was consistent with the result  
285 obtained from individual cells (sFig. 1).

286

### 287 **TRPM3 is potentially permeable to protons**

288 For a better understanding of the proton inhibition of TRPM3, we hypothesized that  
289 protons permeate through TRPM3 when it is activated by PS. The lipid bilayer (*e.g.* cell  
290 membrane) presents a strong barrier for the transport of charged ions through eukaryotic  
291 cell membranes. Although the permeability of protons is higher than other monovalent  
292 cations, which can partially be explained by the presence of transient water wires or long-  
293 lived hydrophilic pores (Tepper and Voth 2005), it is unlikely that these mechanisms can  
294 transport sufficient protons across the membrane to have a direct impact on an  
295 overexpressed protein, unless protons are passing through the overexpressed ion-channel  
296 itself. We thus examined whether protons can permeate through TRPM3. We recorded  
297 TRPM3 inward current in HEK-293 cells, overexpressing hTRPM3-GFP, by holding the  
298 membrane at -100mV and applying PS and low pH solutions from the outside. We  
299 maintained pH<sub>i</sub> at 7.6 to provide a higher concentration gradient for protons. All cations

300 except protons were removed using NMDG in external and internal solutions. PS, along  
301 with NMDG pH 5.5 extracellular solution, produced a small transient inward current in  
302 TRPM3 transfected HEK-293 cells (Fig. 5). Indeed, the amplitude of this current is  
303 significantly lower than TRPM3 currents observed in our whole-cell recordings. This is  
304 because in this experiment, all cations have been removed besides a limited amount of H<sup>+</sup>.  
305 extracellular and intracellular proton concentrations was  $3.2 \times 10^{-3}$  mM (pH 5.5) and  $2.5$   
306  $\times 10^{-5}$  mM (pH 7.6) respectively. These concentrations represent the total cation  
307 concentrations of these solutions, which are several orders of magnitude lower than the  
308 total cation concentrations of our modified Tyrode solutions. In addition, extracellular pH  
309 5.5 blocks about 60% of TRPM3 currents. However, to provide a reasonable proton  
310 gradient across the cell membrane, it is critical to conduct this experiment at a low  
311 extracellular pH. Since, there were no other cation involved, although low in amplitude,  
312 this current suggests passage of proton through TRPM3 channel. In addition, the proton  
313 current is transient is because of the intracellular inhibitory effects of H<sup>+</sup> on TRPM3 after  
314 its permeation. Mock transfected cells did not produce any inward current in response to  
315 PS (Data not shown). This evidence indicates that TRPM3 is potentially permeable to  
316 proton.

317

### 318 **The inhibition of intracellular Ca<sup>2+</sup> on TRPM3 is pH independent**

319 TRPM3 displays higher permeability for divalent cations than monovalent cations. For the  
320 splice variant TRPM3 $\alpha$ 2, 24% of total TRPM3 current is expected to result from Ca<sup>2+</sup>  
321 (Przibilla et al. 2018), suggesting a large increase in [Ca<sup>2+</sup>]<sub>i</sub> following TRPM3 activation.  
322 Multiple studies verified this effect showing an increase in [Ca<sup>2+</sup>]<sub>i</sub> in a micromolar range

323 following TRPM3 activation (Vriens et al. 2011; Straub et al. 2013; Przibilla et al. 2018).  
324 A recent study demonstrated that an increase in  $[Ca^{2+}]_i$ , independent of TRPM3 activity,  
325 inhibits TRPM3 in a calmodulin-dependent manner (Przibilla et al. 2018). This suggests a  
326 potential negative feedback mechanism that regulates a high increase in  $[Ca^{2+}]_i$  resulting  
327 from TRPM3 activation. Studies conducted by others enlist  $[Ca^{2+}]_i$  as a regulator of  
328 TRPM3 activity. In our study, we found that intracellular proton blocks TRPM3 as well..  
329 Hence, we asked the question, how do these two regulatory mechanisms interact with each  
330 other? To find the effect of  $[Ca^{2+}]_i$  on the concentration-dependent inhibition of TRPM3 by  
331 protons, we tested TRPM3 activity in two different  $[Ca^{2+}]_i$  conditions, while providing a  
332 wide range of  $pH_i$ , using whole-cell patch clamp of TRPM3 transfected cells. In addition  
333 to the inhibition of TRPM3 current by  $[Ca^{2+}]_i$  observed by J. Przibilla et al., we observed  
334 an additional delayed inhibition of TRPM3 current by  $Ca^{2+}$ . For example, under  $1\mu M$   
335  $[Ca^{2+}]_i$ , recorded current showed a further inhibition after initial activation and the residual  
336 current amplitudes were less than 50% of the initial activation (Fig 6, B and C). Low  $[Ca^{2+}]_i$   
337 ( $< 10$  nM) did not show a delayed inhibition of TRPM3 current (Fig. 6A).  $pH_i$   
338 concentration-dependence of TRPM3 was not affected by  $[Ca^{2+}]_i$ , as they showed similar  
339  $pH_{50}$  Values ( $7.0 \pm 0.1$ ,  $7.1 \pm 0.1$ ,  $7.2 \pm 0.5$ ) for low  $[Ca^{2+}]_i$ , high  $Ca^{2+}$  initial and high  $Ca^{2+}$   
340 delayed current intensities (Fig. 6E). It is noteworthy that, despite having similar  $pH_{50}$   
341 values, TRPM3 outward current densities were significantly decreased in high  $[Ca^{2+}]_i$   
342 conditions (Fig. 6E). To investigate if protons affected the percentage of current inhibited  
343 in delayed current intensities compared with the initial current intensities, we analyzed the  
344 ratio of delayed to initial current intensities in different  $pH_i$  at high  $[Ca^{2+}]_i$  concentration.  
345 We did not observe any significant difference between the ratios resulting from different



346  $pH_i$  (Fig. 6F). Overall, these results indicate that, although  $[Ca^{2+}]_i$  inhibits TRPM3, it does  
347 not affect the regulation of TRPM3 by intracellular protons.

348

### 349 **Molecular mechanism underlying TRPM3 inhibition by protons**

350 Glutamate, aspartate, histidine, and lysine residues are potential proton acceptors,  
351 especially glutamate and aspartate, which present negative charges (Zhou and Pang 2018).

352 To identify the amino acid residues of TRPM3 accountable for its sensitivity to  $pH_i$ , we

353 prepared hTRPM3-GFP mutant plasmids having mutations in the pore region. We selected

354 all eight glutamate and aspartate amino acids, in the vestibule of the loop between S5 and

355 S6 transmembrane domains (Fig. 7A). These eight residues were either a glutamate and

356 aspartate amino acid, and they were mutated to glutamine. We created two double mutants

357 (E1034Q - E1035Q, E1072Q - D1073Q) and six single mutants (E1055Q, D1059Q,

358 D1062Q, E1069Q, E1072Q, and D1073Q). We expressed these mutants in HEK-293 cells

359 and recorded elicited currents in response to PS, while perfusing with physiological and

360 low pH external solutions (Fig. 7B). Except for E1055Q, which resulted in a non-functional

361 ion-channel, all other mutants exhibited identical I-V relation to WT-hTRPM3, although

362 most of the mutants showed markedly reduced current amplitudes (Fig. 7B). We perfused

363 cells expressing these mutants with external solutions of pH 7.4 and pH 5.5. The pH of 5.5

364 was selected as representative of low pH external solutions because at this pH, WT-TRPM3

365 currents were blocked significantly yet sufficient activity was maintained for analysis. We

366 compared the percent decrease in TRPM3 current from  $pH_o$  7.4 to  $pH_o$  5.5 for all the

367 mutants and WT-TRPM3 (Fig. 7C). The double mutant (E1034Q - E1035Q), E1069Q, and

368 E1072Q showed similar sensitivity to protons when compared with the WT-TRPM3.

369 Mutants D1059Q and D1062Q were found to be more sensitive to protons, as the reduction  
370 of whole-cell current due to low  $pH_o$  was increased to 93.9% and 84.1% in D1059Q and  
371 D1062Q, respectively, compared to 56.5% observed in WT-TRPM3. Mutant D1073Q  
372 showed significantly less sensitivity towards protons, as  $pH_o$  5.5 reduced its current  
373 amplitude only by 25%. As summarized in Fig. 7C, these results establish the amino acid  
374 residues D1059Q, D1062Q and D1073Q as some of the key determinants of protons  
375 sensitivity in TRPM3. Although it is unclear at this moment why mutating these residues  
376 produce variable effects (increased or decreased proton sensitivity), these data suggested  
377 that the pore vestibule of TRPM3 is critical for the pH sensitivity. Further studies are  
378 required to delineate the underlying mechanism of these variable effects.

379

## 380 **Discussion**

381 We demonstrated for the first time that TRPM3 is a proton-permeable channel regulated  
382 by both extracellular and intracellular acidic conditions. Our experiments suggest a direct  
383 interaction of intracellular protons with the cytoplasmic side of TRPM3 to induce a  
384 blocking effect, whereas extracellular protons permeate through the ion-channel first to  
385 block it from the intracellular side. We also demonstrated that the blocking effect of the  
386 intracellular protons could be reversed by decreasing intracellular protons concentrations,  
387 which indicates a reversible binding of protons to the intracellular amino acid residues. We  
388 identified an internal residue responsible for protons sensitivity of TRPM3. Finally, we  
389 demonstrated that low internal pH produces a downward shift of PS concentration-  
390 dependent activation of TRPM3 by reducing the amplitude of TRPM3-mediated currents

391 at any given pH<sub>o</sub>. Overall, we report evidence for the regulatory role of protons on TRPM3  
392 activation and the molecular mechanism responsible for it.

393

### 394 **General characteristics of TRPM3**

395 TRPM3 is a heat-sensitive ion channel, which is expressed in a somatosensory neuron  
396 where its role as a noxious heat sensor has been established (Vriens et al. 2011;  
397 Vandewauw et al. 2018). Activation of pancreatic TRPM3 increases glucose-induced  
398 insulin release (Wagner et al. 2008). These data indicate the existence of multiple TRPM3  
399 regulatory molecules. Indeed, cytosolic phosphatidylinositol biphosphates (PIPs) and  
400 ATP have a stimulatory effect on TRPM3. Activation of phospholipase C-coupled  
401 muscarinic acetylcholine receptors inhibit recombinant and endogenous TRPM3 (Toth et  
402 al. 2015). Calmodulin binds to multiple sites of TRPM3 in Ca<sup>2+</sup>-dependent manner, and  
403 both intracellular calmodulin and Ca<sup>2+</sup> inhibits TRPM3 (Holakovska et al. 2012; Przibilla  
404 et al. 2018). Here we report the modulatory role of protons on TRPM3. Reversible  
405 inhibition of TRPM3 by protons indicates that acidic pH may serve as a negative feedback  
406 mechanism to regulate TRPM3 activity in physiological/pathological conditions.

407

### 408 **Regulations of pH on TRP channels**

409 Acidification has modulatory effects on variety of ion channels (discussed in the  
410 introduction) including TRP channels. Extracellular acidic pH modulates TRPV1 channel  
411 gating (Jordt, Tominaga, and Julius 2000; Ryu, Liu, and Qin 2003), stimulates TRPC4 and  
412 TRPC5, but inhibits TRPC6 (Semtner et al. 2007), TRPM5 (Liu, Zhang, and Liman 2005),  
413 and TRPV5 (Yeh et al. 2003), and potentiates TRPM6 and TRPM7 inward currents (Jiang,

414 Li, and Yue 2005; Li, Jiang, and Yue 2006; Li et al. 2007). Intracellular protons inhibit  
415 TRPM7 (Kozak et al. 2005), and block TRPM8 (Andersson, Chase, and Bevan 2004). Here  
416 we demonstrate that PS-induced TRPM3 outward and inward currents both are inhibited  
417 by protons. Although both intracellular and extracellular acidic conditions inhibit TRPM3,  
418 there are differences between internal and external proton-induced inhibition. Extracellular  
419 protons cannot inhibit TRPM3 until pH reaches below 6.0, but  $pH_i$  has a  $pH_{50}$  value of 6.9.  
420 We demonstrated a very sharp inhibition by protons at an external pH below 6.0; this  
421 inhibition did not follow a typical concentration-response relationship. Whereas internal  
422 protons efficiently blocked TRPM3 current and showed a concentration-response  
423 relationship. These results suggest that protons are not competing with PS for the same  
424 binding site of TRPM3, and indicated that TRPM3 may contain proton-binding sites in the  
425 cytoplasmic domains. It is plausible that an increase in extracellular proton's concentration  
426 causes protons influx through TRPM3 that enables protons to bind to its internal binding  
427 site to inhibit TRPM3. To rule out the effects of proton-activated endogenous chloride  
428 currents, we conducted all whole-cell recordings under very low intracellular and  
429 extracellular  $Cl^-$  concentrations. Indeed, our external and internal solutions contained 8  
430 mM  $Cl^-$ , but this concentration of protons is not capable of activating endogenous anions  
431 channels of HEK293 cells (Lambert and Oberwinkler 2005).

432

### 433 **Mechanisms of effects of protons on TRPM3**

434 It appeared that extracellular pH (< 6.0) strongly blocks TRPM3 activities, which would  
435 indicate TRPM3 is regulated by extracellular acidic pH directly. However, the lack of pH  
436 concentration-dependent activity did not support this hypothesis. These findings led us to

437 the conclusion that protons do not have extracellular binding sites, at least under the  
438 activations of PS. Reduced intracellular pH appeared to have clear pH concentration-  
439 dependent effects on TRPM3, which begs the question: how might external protons affect  
440 TRPM3 gating properties? The cell membrane must have a mechanism for the proton  
441 permeation and thus change the intracellular pH. It is possible that protons cross the  
442 TRPM3 while it is open, although we cannot exclude the possibility that protons may  
443 permeate the cell membrane directly.

444 Our data suggests that protons directly cross TRPM3 when it is activated by PS.  
445 Consistently, no proton current was found without activating TRPM3, supporting the  
446 conclusion that TRPM3 is potentially permeable to protons. We also studied the regulation  
447 of TRPM3 by  $\text{Ca}^{2+}$ . Previous studies have shown that TRPM3 is a  $\text{Ca}^{2+}$  permeable ion  
448 channel (Grimm et al. 2003; Lee et al. 2003). TRPM3 channel activity strongly depends  
449 on intracellular  $\text{Ca}^{2+}$  (Przibilla et al. 2018). Along with the inhibition of TRPM3 current  
450 amplitude, we also found that  $\text{Ca}^{2+}$  accelerates the decay time of TRPM3. Increased  $[\text{Ca}^{2+}]_i$   
451 from minimum to  $1\ \mu\text{M}$  significantly reduces the plateau of the current. In general,  $[\text{Ca}^{2+}]_i$   
452 is a key regulator to modulate the TRPM3 gating - we hoped to visualize the interaction  
453 between  $[\text{Ca}^{2+}]_i$  and protons. However, high  $[\text{Ca}^{2+}]_i$  did not change the  $\text{pH}_{50}$  of the effects  
454 of intracellular protons on TRPM3 (Fig. 6). Vice versa, decreased  $[\text{H}^+]_i$  did not affect the  
455  $\text{Ca}^{2+}$  inhibition on TRPM3 (Fig. 6). Therefore, it appears unlikely that protons can inhibit  
456 TRPM3 channel activities by competing with  $[\text{Ca}^{2+}]_i$  for a binding site on the cytoplasmic  
457 side.

458 To determine the molecular mechanism by which intracellular protons inhibit  
459 TRPM3, we mutated all the titratable residues in the pore region between S5 and S6 to

460 determine which sites are responsible for  $\text{pH}_i$  sensitivity. Among most of the mutations of  
461 Asp and Glu residues, three residues-D1059, D1062 and D1073-which we predicted to  
462 locate in the inner vestibule in the pore region, strongly change the proton sensitivities. We  
463 conclude these residues in the pore region could be the proton binding sites. Of course, we  
464 should not exclude any other intracellular binding sites. For example, C terminus of the  
465 S4-S5 linker is thought to be critical for changing TRP channel's  $\text{pH}_i$  sensitivity (Du, Xie,  
466 and Yue 2009). Although, how intracellular protons change TRPM3 gating properties  
467 through these residues is still unknown, it will be of interest to investigate whether acidic  
468 intracellular pH alters intracellular signaling pathways in future studies. It will also be of  
469 interest to investigate other potential proton binding sites that might interact with  $[\text{Ca}^{2+}]_i$   
470 near the intracellular mouth and act as the  $[\text{Ca}^{2+}]_i$ -activating site to regulate  $[\text{Ca}^{2+}]_i$   
471 mediated TRPM3 activation. Further investigation is required to test this hypothesis.

472

### 473 **Conclusion**

474 Our findings suggest that cellular acidification serves as a negative or protective feedback  
475 mechanism to limit TRPM3 activities. Although the development of intracellular acidosis  
476 has not been well established, metabolic acidosis is a relatively common condition that  
477 causes  $\text{pH}_i$  to fall (Salameh, Ruffin, and Boron 2014). Some reports suggest that during  
478 metabolic acidosis, insulin secretion is depressed (Mak 1998; Bigner et al. 1996). Thus, it  
479 is possible that a low pH-mediated dampening of TRPM3 activity might contribute to the  
480 decreased insulin secretion observed in metabolic acidosis. If true, then modulating  
481 TRPM3 activity might be a potential future clinical application in treating acidosis induced  
482 pancreatic disorders.

483 Collectively, we show that external and internal acidic pH show strong and state-  
484 dependent inhibition of the TRPM3 channels. Asp1073 residue in the inner vestibule of the  
485 channel pore is critical in modulating this inhibition. Given the physiological significance  
486 of TRPM3 in numerous cells, including pancreatic beta cells and sensory neurons,  
487 understanding TRPM3 gating by protons may generate new physiological and/or  
488 pathological insights.

489

#### 490 **Acknowledgement**

491 We thank Dr. C. Harteneck for providing the TRPM3 construct. We thank Dr. Lixia Yue  
492 for her suggestions and comments. We thank Dr. Boren Lin, Erin Koffman, Tyler Ortyl,  
493 Farzaneh Naghavi, and Kritika Singh for their comments. J.D. is supported by the National  
494 Institutes of Mental Health (5R01 MH113986). LRR is supported by the National Institutes  
495 of Health (R00HL119560, OT2OD023854, OT2OD026582)

496

#### 497 **Conflict of Interest**

498 The authors declare no conflict of interest.

499

#### 500 **Author Contributions**

501 J.D. conceived and supervised the project. J.D., MZ.HS. and L.X. designed the experiments  
502 with input from Y.S.L. and L.R.R. MZ.HS. and L.X. did most of the patch-clamp  
503 experiments. Y.S.L. and L.R.R. performed molecular biology experiments and oversaw the  
504 mutagenesis of TRPM3. MZ.HS. and J.D. drafted the manuscript with input from all  
505 authors contributed to finalizing the manuscript.

506

## 507 **Abbreviations**

508 TRP: Transient Receptor Potential; TRPM: Melastatin-like TRP channels; GFP: Green  
509 Fluorescent Protein; NMDG: N-methyl-D-glucamine; PS: Pregnenolone Sulfate;  
510  $pH_o$ : Extracellular pH;  $pH_i$ : Intracellular pH; AP-1: Activator Protein-1; Egr-1: Early  
511 Growth Response protein 1; CRE: cAMP response element; K2p: Two-pore domain  $K^+$   
512 channels; TWIK: Tandem of pore domains in Weak Inward rectifier  $K^+$  channels; TASK:  
513 TWIK-related Acid-Sensitive  $K^+$  channels; Kir: Inward rectifier  $K^+$  channel; TREK:  
514 TWIK-RElated  $K^+$  channels; TRESK: TWIK-RElated spinal cord  $K^+$  channels; TALK:  
515 TWIK-related ALkaline pH-activated  $K^+$  channels; ATP: Adenosine TriPhosphate;  
516 PKD2L1: Polycystic Kidney Disease 2-Like ion channel-1; CGRP: Calcitonin Gene-  
517 Related Protein.

518

519

## 520 **References**

521 Alonso-Carbajo, L., Y. A. Alpizar, J. B. Startek, J. R. Lopez-Lopez, M. T. Perez-Garcia,  
522 and K. Talavera. 2019. 'Activation of the cation channel TRPM3 in perivascular  
523 nerves induces vasodilation of resistance arteries', *J Mol Cell Cardiol*, 129: 219-  
524 30.  
525 Andersson, D. A., H. W. Chase, and S. Bevan. 2004. 'TRPM8 activation by menthol,  
526 icilin, and cold is differentially modulated by intracellular pH', *J Neurosci*, 24:  
527 5364-9.  
528 Bennett, Thomas M., Donna S. Mackay, Carla J. Siegfried, and Alan Shiels. 2014.  
529 'Mutation of the melastatin-related cation channel, TRPM3, underlies inherited  
530 cataract and glaucoma', *PLoS One*, 9: e104000-e00.  
531 Bigner, D. R., J. P. Goff, M. A. Faust, J. L. Burton, H. D. Tyler, and R. L. Horst. 1996.  
532 'Acidosis effects on insulin response during glucose tolerance tests in Jersey  
533 cows', *J Dairy Sci*, 79: 2182-8.  
534 Brauchi, S., and P. Orío. 2011. 'Voltage sensing in thermo-TRP channels', *Adv Exp Med  
535 Biol*, 704: 517-30.



- 536 Caterina, M. J., M. A. Schumacher, M. Tominaga, T. A. Rosen, J. D. Levine, and D.  
537 Julius. 1997. 'The capsaicin receptor: a heat-activated ion channel in the pain  
538 pathway', *Nature*, 389: 816-24.
- 539 Chandrashekar, J., M. A. Hoon, N. J. Ryba, and C. S. Zuker. 2006. 'The receptors and  
540 cells for mammalian taste', *Nature*, 444: 288-94.
- 541 Ciurtin, C., Y. Majeed, J. Naylor, P. Sukumar, A. A. English, P. Emery, and D. J. Beech.  
542 2010. 'TRPM3 channel stimulated by pregnenolone sulphate in synovial  
543 fibroblasts and negatively coupled to hyaluronan', *BMC Musculoskelet Disord*,  
544 11: 111.
- 545 Clapham, D. E. 2003. 'TRP channels as cellular sensors', *Nature*, 426: 517-24.
- 546 Du, Jianyang, Jia Xie, and Lixia Yue. 2009. 'Modulation of TRPM2 by acidic pH and the  
547 underlying mechanisms for pH sensitivity', *The Journal of general physiology*,  
548 134: 471-88.
- 549 Dyment, David A, Paulien A Terhal, Cecilie F Rustad, Kristian Tveten, Christopher  
550 Griffith, Parul Jayakar, Marwan Shinawi, Sara Ellingwood, Rosemarie Smith, and  
551 Koen van Gassen. 2019. 'De novo substitutions of TRPM3 cause intellectual  
552 disability and epilepsy', *European Journal of Human Genetics*, 27: 1611-18.
- 553 Everaerts, W., M. Gees, Y. A. Alpizar, R. Farre, C. Leten, A. Apetrei, I. Dewachter, F.  
554 van Leuven, R. Vennekens, D. De Ridder, B. Nilius, T. Voets, and K. Talavera.  
555 2011. 'The capsaicin receptor TRPV1 is a crucial mediator of the noxious effects  
556 of mustard oil', *Curr Biol*, 21: 316-21.
- 557 Gerdes, J. M., Y. Liu, N. A. Zaghloul, C. C. Leitch, S. S. Lawson, M. Kato, P. A.  
558 Beachy, P. L. Beales, G. N. DeMartino, S. Fisher, J. L. Badano, and N. Katsanis.  
559 2007. 'Disruption of the basal body compromises proteasomal function and  
560 perturbs intracellular Wnt response', *Nat Genet*, 39: 1350-60.
- 561 Grimm, C., R. Kraft, S. Sauerbruch, G. Schultz, and C. Harteneck. 2003. 'Molecular and  
562 functional characterization of the melastatin-related cation channel TRPM3', *J*  
563 *Biol Chem*, 278: 21493-501.
- 564 Hardie, R. C. 2014. 'Photosensitive TRPs', *Handb Exp Pharmacol*, 223: 795-826.
- 565 Hardie, R. C., and K. Franze. 2012. 'Photomechanical responses in Drosophila  
566 photoreceptors', *Science*, 338: 260-3.
- 567 Held, Katharina, Marie Mulier, Nele Van Ranst, Yang Ge, Thomas Voets, Yu Tian  
568 Wang, and Joris Vriens. 2020. 'TRPM3 Inhibits Synaptic Transmission and  
569 Plasticity in the Hippocampus', *Biophysical Journal*, 118: 21a.
- 570 Holakovska, B., L. Grycova, M. Jirku, M. Sulc, L. Bumba, and J. Teisinger. 2012.  
571 'Calmodulin and S100A1 protein interact with N terminus of TRPM3 channel', *J*  
572 *Biol Chem*, 287: 16645-55.
- 573 Holzer, Peter. 2009. 'Acid-sensitive ion channels and receptors', *Handbook of*  
574 *experimental pharmacology*: 283-332.
- 575 Huang, Angela L., Xiaoke Chen, Mark A. Hoon, Jayaram Chandrashekar, Wei Guo,  
576 Dimitri Tränkner, Nicholas J. P. Ryba, and Charles S. Zuker. 2006. 'The cells and  
577 logic for mammalian sour taste detection', *Nature*, 442: 934-38.
- 578 Jacobs, M. H. 1922. 'The influence of ammonium salts on cell reaction', *J Gen Physiol*, 5:  
579 181-8.
- 580 Jiang, J., M. Li, and L. Yue. 2005. 'Potentiation of TRPM7 inward currents by protons', *J*  
581 *Gen Physiol*, 126: 137-50.

- 582 Jordt, S. E., M. Tominaga, and D. Julius. 2000. 'Acid potentiation of the capsaicin  
583 receptor determined by a key extracellular site', *Proc Natl Acad Sci U S A*, 97:  
584 8134-9.
- 585 Kozak, J. A., M. Matsushita, A. C. Nairn, and M. D. Cahalan. 2005. 'Charge screening by  
586 internal pH and polyvalent cations as a mechanism for activation, inhibition, and  
587 rundown of TRPM7/MIC channels', *J Gen Physiol*, 126: 499-514.
- 588 Lambert, S., and J. Oberwinkler. 2005. 'Characterization of a proton-activated, outwardly  
589 rectifying anion channel', *J Physiol*, 567: 191-213.
- 590 Lee, N., J. Chen, L. Sun, S. Wu, K. R. Gray, A. Rich, M. Huang, J. H. Lin, J. N. Feder, E.  
591 B. Janovitz, P. C. Levesque, and M. A. Blonar. 2003. 'Expression and  
592 characterization of human transient receptor potential melastatin 3 (hTRPM3)', *J*  
593 *Biol Chem*, 278: 20890-7.
- 594 Lesch, A., S. Rubil, and G. Thiel. 2014. 'Activation and inhibition of transient receptor  
595 potential TRPM3-induced gene transcription', *Br J Pharmacol*, 171: 2645-58.
- 596 Li, M., J. Du, J. Jiang, W. Ratzan, L. T. Su, L. W. Runnels, and L. Yue. 2007. 'Molecular  
597 determinants of Mg<sup>2+</sup> and Ca<sup>2+</sup> permeability and pH sensitivity in TRPM6 and  
598 TRPM7', *J Biol Chem*, 282: 25817-30.
- 599 Li, M., J. Jiang, and L. Yue. 2006. 'Functional characterization of homo- and heteromeric  
600 channel kinases TRPM6 and TRPM7', *J Gen Physiol*, 127: 525-37.
- 601 Liedtke, W., and J. M. Friedman. 2003. 'Abnormal osmotic regulation in *trpv4*<sup>-/-</sup> mice',  
602 *Proc Natl Acad Sci U S A*, 100: 13698-703.
- 603 Liu, D., Z. Zhang, and E. R. Liman. 2005. 'Extracellular acid block and acid-enhanced  
604 inactivation of the Ca<sup>2+</sup>-activated cation channel TRPM5 involve residues in the  
605 S3-S4 and S5-S6 extracellular domains', *J Biol Chem*, 280: 20691-9.
- 606 Mak, R. H. 1998. 'Effect of metabolic acidosis on insulin action and secretion in uremia',  
607 *Kidney Int*, 54: 603-7.
- 608 Maroto, R., A. Raso, T. G. Wood, A. Kurosky, B. Martinac, and O. P. Hamill. 2005.  
609 'TRPC1 forms the stretch-activated cation channel in vertebrate cells', *Nat Cell*  
610 *Biol*, 7: 179-85.
- 611 McKemy, D. D., W. M. Neuhausser, and D. Julius. 2002. 'Identification of a cold  
612 receptor reveals a general role for TRP channels in thermosensation', *Nature*, 416:  
613 52-8.
- 614 Minke, B. 1977. 'Drosophila mutant with a transducer defect', *Biophys Struct Mech*, 3:  
615 59-64.
- 616 Montell, C., K. Jones, E. Hafen, and G. Rubin. 1985. 'Rescue of the Drosophila  
617 phototransduction mutation *trp* by germline transformation', *Science*, 230: 1040-3.
- 618 Moran, M. M., and A. Szallasi. 2018. 'Targeting nociceptive transient receptor potential  
619 channels to treat chronic pain: current state of the field', *Br J Pharmacol*, 175:  
620 2185-203.
- 621 Muller, I., O. G. Rossler, and G. Thiel. 2011. 'Pregnenolone sulfate activates basic region  
622 leucine zipper transcription factors in insulinoma cells: role of voltage-gated Ca<sup>2+</sup>  
623 channels and transient receptor potential melastatin 3 channels', *Mol Pharmacol*,  
624 80: 1179-89.
- 625 Naylor, J., J. Li, C. J. Milligan, F. Zeng, P. Sukumar, B. Hou, A. Sedo, N. Yuldasheva, Y.  
626 Majeed, D. Beri, S. Jiang, V. A. Seymour, L. McKeown, B. Kumar, C. Harteneck,  
627 D. O'Regan, S. B. Wheatcroft, M. T. Kearney, C. Jones, K. E. Porter, and D. J.

- 628 Beech. 2010. 'Pregnenolone sulphate- and cholesterol-regulated TRPM3 channels  
629 coupled to vascular smooth muscle secretion and contraction', *Circ Res*, 106:  
630 1507-15.
- 631 Oberwinkler, J., A. Lis, K. M. Giehl, V. Flockerzi, and S. E. Philipp. 2005. 'Alternative  
632 splicing switches the divalent cation selectivity of TRPM3 channels', *J Biol*  
633 *Chem*, 280: 22540-8.
- 634 Oberwinkler, J., and S. E. Philipp. 2014. 'TRPM3', *Handb Exp Pharmacol*, 222: 427-59.
- 635 Pan, Z., H. Yang, and P. S. Reinach. 2011. 'Transient receptor potential (TRP) gene  
636 superfamily encoding cation channels', *Hum Genomics*, 5: 108-16.
- 637 Przibilla, J., S. Dembla, O. Rizun, A. Lis, M. Jung, J. Oberwinkler, A. Beck, and S. E.  
638 Philipp. 2018. 'Ca(2+)-dependent regulation and binding of calmodulin to  
639 multiple sites of Transient Receptor Potential Melastatin 3 (TRPM3) ion  
640 channels', *Cell Calcium*, 73: 40-52.
- 641 Quallo, T., N. Vastani, E. Horridge, C. Gentry, A. Parra, S. Moss, F. Viana, C. Belmonte,  
642 D. A. Andersson, and S. Bevan. 2015. 'TRPM8 is a neuronal osmosensor that  
643 regulates eye blinking in mice', *Nat Commun*, 6: 7150.
- 644 Ryu, S., B. Liu, and F. Qin. 2003. 'Low pH potentiates both capsaicin binding and  
645 channel gating of VR1 receptors', *J Gen Physiol*, 122: 45-61.
- 646 Salameh, A. I., V. A. Ruffin, and W. F. Boron. 2014. 'Effects of metabolic acidosis on  
647 intracellular pH responses in multiple cell types', *Am J Physiol Regul Integr Comp*  
648 *Physiol*, 307: R1413-27.
- 649 Semtner, M., M. Schaefer, O. Pinkenburg, and T. D. Plant. 2007. 'Potentiation of TRPC5  
650 by protons', *J Biol Chem*, 282: 33868-78.
- 651 Smith, C. C., T. T. Gibbs, and D. H. Farb. 2014. 'Pregnenolone sulfate as a modulator of  
652 synaptic plasticity', *Psychopharmacology (Berl)*, 231: 3537-56.
- 653 Straub, I., U. Krugel, F. Mohr, J. Teichert, O. Rizun, M. Konrad, J. Oberwinkler, and M.  
654 Schaefer. 2013. 'Flavanones that selectively inhibit TRPM3 attenuate thermal  
655 nociception in vivo', *Mol Pharmacol*, 84: 736-50.
- 656 Strotmann, R., C. Harteneck, K. Nunnenmacher, G. Schultz, and T. D. Plant. 2000.  
657 'OTRPC4, a nonselective cation channel that confers sensitivity to extracellular  
658 osmolarity', *Nat Cell Biol*, 2: 695-702.
- 659 Sun, Y., L. Liu, Y. Ben-Shahar, J. S. Jacobs, D. F. Eberl, and M. J. Welsh. 2009. 'TRPA  
660 channels distinguish gravity sensing from hearing in Johnston's organ', *Proc Natl*  
661 *Acad Sci U S A*, 106: 13606-11.
- 662 Suzuki, M., A. Mizuno, K. Kodaira, and M. Imai. 2003. 'Impaired pressure sensation in  
663 mice lacking TRPV4', *J Biol Chem*, 278: 22664-8.
- 664 Tepper, H. L., and G. A. Voth. 2005. 'Protons may leak through pure lipid bilayers via a  
665 concerted mechanism', *Biophys J*, 88: 3095-108.
- 666 Toth, B. I., M. Konrad, D. Ghosh, F. Mohr, C. R. Halaszovich, M. G. Leitner, J. Vriens,  
667 J. Oberwinkler, and T. Voets. 2015. 'Regulation of the transient receptor potential  
668 channel TRPM3 by phosphoinositides', *J Gen Physiol*, 146: 51-63.
- 669 Uchida, K., N. Fukuta, J. Yamazaki, and M. Tominaga. 2019. 'Identification and  
670 classification of a new TRPM3 variant (gamma subtype)', *J Physiol Sci*, 69: 623-  
671 34.

- 672 Vandewauw, I., K. De Clercq, M. Mulier, K. Held, S. Pinto, N. Van Ranst, A. Segal, T.  
673 Voet, R. Vennekens, K. Zimmermann, J. Vriens, and T. Voets. 2018. 'A TRP  
674 channel trio mediates acute noxious heat sensing', *Nature*, 555: 662-66.
- 675 Vangeel, L., M. Benoit, Y. Miron, P. E. Miller, K. De Clercq, P. Chaltin, C. Verfaillie, J.  
676 Vriens, and T. Voets. 2020. 'Functional expression and pharmacological  
677 modulation of TRPM3 in human sensory neurons', *Br J Pharmacol*.
- 678 Venkatachalam, Kartik, and Craig Montell. 2007. 'TRP channels', *Annual review of*  
679 *biochemistry*, 76: 387-417.
- 680 Vriens, J., G. Owsianik, T. Hofmann, S. E. Philipp, J. Stab, X. Chen, M. Benoit, F. Xue,  
681 A. Janssens, S. Kerselaers, J. Oberwinkler, R. Vennekens, T. Gudermann, B.  
682 Nilius, and T. Voets. 2011. 'TRPM3 is a nociceptor channel involved in the  
683 detection of noxious heat', *Neuron*, 70: 482-94.
- 684 Wagner, T. F., S. Loch, S. Lambert, I. Straub, S. Mannebach, I. Mathar, M. Dufer, A. Lis,  
685 V. Flockerzi, S. E. Philipp, and J. Oberwinkler. 2008. 'Transient receptor potential  
686 M3 channels are ionotropic steroid receptors in pancreatic beta cells', *Nat Cell*  
687 *Biol*, 10: 1421-30.
- 688 Warburg, E. J. 1922. 'Studies on Carbonic Acid Compounds and Hydrogen Ion Activities  
689 in Blood and Salt Solutions. A Contribution to the Theory of the Equation of  
690 Lawrence J. Henderson and K. A. Hasselbach: Introduction', *Biochem J*, 16: 153-  
691 4.
- 692 Yeh, B. I., T. J. Sun, J. Z. Lee, H. H. Chen, and C. L. Huang. 2003. 'Mechanism and  
693 molecular determinant for regulation of rabbit transient receptor potential type 5  
694 (TRPV5) channel by extracellular pH', *J Biol Chem*, 278: 51044-52.
- 695 Zamudio-Bulcock, P. A., J. Everett, C. Harteneck, and C. F. Valenzuela. 2011.  
696 'Activation of steroid-sensitive TRPM3 channels potentiates glutamatergic  
697 transmission at cerebellar Purkinje neurons from developing rats', *J Neurochem*,  
698 119: 474-85.
- 699 Zhou, Huan-Xiang, and Xiaodong Pang. 2018. 'Electrostatic Interactions in Protein  
700 Structure, Folding, Binding, and Condensation', *Chemical reviews*, 118: 1691-  
701 741.

702

## Figure legends

**Figure 1** Inhibitory effect of extracellular acidic pH on TRPM3 activation by PS. (a) Time course of TRPM3 currents elicited by voltage ramps ranging -100 to +100 mV. Both inward and outward currents were completely and reversibly inhibited by  $\text{pH}_o$  4.5. 50  $\mu\text{M}$  PS was applied extracellularly and was washed with PS-free extracellular solution between subsequent PS application. Inward and outward currents were measured at -100 and +100 mV, respectively. (b) Representative recording of TRPM3 current in (a) by ramp protocols ranging from -100 to +100 mV at the indicated  $\text{pH}_o$ . (c) Mean current amplitude of TRPM3 at the indicated  $\text{pH}_o$  in (a) (mean  $\pm$  SEM;  $n = 11$ , \* indicates  $p < 0.05$  by unpaired Student's t-test; "n.s." indicates not statistically significant). (d) Current amplitude at the indicated  $\text{pH}_o$  normalized to the current amplitude at  $\text{pH}_o$  7.4 in (a). When compared with  $\text{pH}_o$  7.4,  $p$  value for  $\text{pH}_o$  7.0 and 6.0 were 0.15 and 0.06, respectively. Background electrical activity before application of PS are subtracted in all quantitative analysis. (e) Time course of TRPM3 currents elicited by voltage ramps ranging -100 to +100 mV. PS was applied continuously while reducing extracellular pH without allowing any washing period between subsequent extracellular solution applications. (f) Representative recording of TRPM3 current in (e) by ramp protocols ranging from -100 to +100 mV at the indicated  $\text{pH}_o$ . (g) Mean current amplitude of TRPM3 at the indicated  $\text{pH}_o$  in (E) (mean  $\pm$  SEM;  $n = 7$ , \* indicates  $p < 0.05$  by unpaired Student's t-test; "n.s." indicates not statistically significant). (h) Current amplitude at the indicated  $\text{pH}_o$  normalized to the current amplitude at  $\text{pH}_o$  7.4.

**Figure 2** Intracellular acidification blocks TRPM3 activation by PS in a concentration-dependent manner. (a) Representative recordings and time courses (insert) of TRPM3 current by ramp

protocols ranging from -100 to +100 mV at the indicated pH<sub>i</sub>. PS was applied through the extracellular solution (pH<sub>o</sub> 7.4) and different cells were exposed to different pH<sub>i</sub> while keeping that pH<sub>i</sub> constant. (b) Mean current amplitude of TRPM3 at the indicated pH<sub>i</sub> (mean ± SEM; n = 8 - 14). (c and d) pH<sub>i</sub> concentration-dependence of TRPM3 activation by PS. c and d show outward and inward current, respectively, elicited by TRPM3 after extracellular PS application, by voltage ramp ranging -100 to +100 mV. TRPM3 currents exerted at -100 and +100 mV were considered as inward and outward current, respectively, and were utilized for these plots. All currents were normalized to corresponding capacitance of the cell overexpressing hTRPM3-GFP. Each data point is the mean of 8-14 cells with the error bar showing SEM, at the indicated pH<sub>i</sub>. Inhibitory pH<sub>50</sub> values were measured separately for outward (pH<sub>50</sub> = 6.9 ± 0.11) and inward (pH<sub>50</sub> = 6.9 ± 0.15) currents.

**Figure 3** Concentration–response curve for PS-induced currents in hTRPM3, at the indicated intracellular pH. (a) Time course of TRPM3 currents elicited by voltage ramps ranging -100 to +100 mV. PS was applied extracellularly in increasing concentration sequence at concentrations of 0, 0.1, 1, 10, 20, 50, 100 and 500 μM, with adequate washing period between subsequent PS applications. (b) Representative recording of TRPM3 current at the indicated PS concentration in (a). (c) Mean outward currents measured at +100 mV and normalized to corresponding capacitance of the cell, error bars showing SEM (n = 7 cells), plotted against logarithmic values of PS concentrations. (d) Outward current normalized to maximum concentration-response (500 μM) of the same cell in (c). The EC<sub>50</sub> values of PS for the outward currents are 16.4 ± 1.1 μM at pH 7.2 and 15.8 ± 1.1 μM at pH 6.0. (e). Mean inward currents measured at -100 mV and normalized to corresponding capacitance of the cell, error bars showing SEM (n = 7 cells), plotted against



logarithmic values of PS concentrations. (f). Inward current normalized to maximum concentration-response (500  $\mu\text{M}$ ) of the same cell in (c). The  $\text{EC}_{50}$  values of PS for the inward currents are  $21.0 \pm 1.0 \mu\text{M}$  at pH 7.2 and  $26.0 \pm 1.0 \mu\text{M}$  at pH 6.0.

**Figure 4** Inhibitory effect of low intracellular pH on TRPM3 can be reversed by perfusing cells with extracellular solution containing  $\text{NH}_4\text{Cl}$ . (a) Time course showing outward and inward current, recorded at +100 and -100 mV respectively, obtained from HEK cells overexpressing TRPM3, under voltage ramp protocol ranging -100 to +100 mV, ( $\text{pH}_i = 6.0$ ,  $n = 11$  cells). Indicated concentrations of  $\text{NH}_4\text{Cl}$  was applied extracellularly along with PS. To achieve similar osmolarity, all extracellular  $\text{Na}^+$  concentration was lowered to 85mM and osmolarities were adjusted to  $300 \pm 10$  mOsm by mannitol. Adequate washing time (1 - 3 minutes) was provided after each application of  $\text{NH}_4\text{Cl}$ , to bring the current down to the basal level, which is 6.0 for all the cells recorded. Representative current was plotted versus time in the presence of extracellular  $\text{NH}_4\text{Cl}$  and PS, at the indicated concentrations. To achieve similar osmolarity, all extracellular buffer  $\text{Na}^+$  concentration was lowered to 85mM and osmolarities were adjusted to  $300 \pm 10$  mOsm by mannitol. (b) Representative recording of TRPM3 current by ramp protocols ranging from -100 mV to +100 mV at the indicated  $\text{NH}_4\text{Cl}$  concentrations. (c) Mean outward and inward TRPM3 current at the indicated  $\text{NH}_4\text{Cl}$  concentrations (mean  $\pm$  SEM,  $n=11$  cells). \* indicates  $p<0.05$  by unpaired Student's t-test. (d) Representative recording of TRPM3 current by the dose-dependent effects of  $\text{NH}_4\text{Cl}$ . The applications of extracellular  $\text{NH}_4\text{Cl}$  at the indicated concentrations. (e) Representative recording of TRPM3 current by ramp protocols ranging from -100 mV to +100 mV at the indicated  $\text{NH}_4\text{Cl}$  concentration. (From panel d) (f) Mean outward and inward TRPM3 current at the indicated  $\text{NH}_4\text{Cl}$  concentration. (From replicated experiment of panel D) (mean  $\pm$  SEM,

n=11 cells). (g & h) Concentration-dependence curves of effects of NH<sub>4</sub>Cl on TRPM3 activations, outward (g) and inward (h) currents, respectively. All currents were normalized to corresponding capacitance of the cell overexpressing hTRPM3 (mean ± SEM, n=11 cells) at the indicated NH<sub>4</sub>Cl concentration. EC<sub>50</sub> values were measured separately for outward (NH<sub>4</sub>Cl<sub>50</sub> = 2.7 ± 0.3 μM) currents, whereas the inward currents continues to increase after applying 60 mM NH<sub>4</sub>Cl. (i) Mean ratio of inward current to outward current plotted against NH<sub>4</sub>Cl concentrations (mean ± SEM, n=11 cells).

**Figure 5** TRPM3 is potentially permeable to protons. (a) Schematic showing the protons permeation recording condition, where all intracellular and extracellular ions were replaced by NMDG and glutamic acid, respectively, except for protons. 50 μM PS was applied while holding hTRPM3-GFP transfected HEK cells at -100 mV. (b) Inward currents were elicited by PS application. No PS activated current under the NMDG solution at pH<sub>o</sub> 7.40, while lowering down the pH<sub>o</sub> to 5.50 generated a small and transient inward current. Insert panel shows the inward current recorded during NMDG-PS (pH 5.5) application. (c) Mean current amplitude in response to PS at the indicated conditions (mean ± SEM, n = 8 cells). (d) Relative current amplitude in response to PS, comparing with Tyrode (pH<sub>o</sub> 7.4) solution response of the same cell (mean ± SEM, n = 8 cells).

**Figure 6** Inhibitory effect of intracellular high Ca<sup>2+</sup> on TRPM3 activation by PS. (a and b) Time course of TRPM3 currents elicited by voltage ramps ranging -100 to +100 mV at the indicated [Ca<sup>2+</sup>]<sub>i</sub> concentration. At high [Ca<sup>2+</sup>]<sub>i</sub> (1 μM), TRPM3 is activated by PS initially (Black symbol), but runs down soon afterwards (Red symbol). Whereas the TRPM3 current was sustained at the



low  $[Ca^{2+}]_i$  condition. Inserts show the representative recordings from the indicated points. (c) Mean current amplitude of TRPM3 at the indicated  $[Ca^{2+}]_i$  (mean  $\pm$  SEM; n = 10). \* indicates  $p < 0.05$  by unpaired Student's t-test; "n.s." indicates not statistically significant. (d) Time course and representative recordings of TRPM3 current with  $[Ca^{2+}]_i$  (1  $\mu$ M) at the indicated  $pH_i$  from  $pH_i$  8.0 to  $pH_i$  6.0. (e) pH concentration-dependence of TRPM3 activation by PS at the indicated  $[Ca^{2+}]_i$ . Green and blue symbols both represent high  $[Ca^{2+}]_i$ , while green represents currents elicited right after PS application (peak after onset), and blue represent currents remaining after inhibition of by high  $[Ca^{2+}]_i$  (80s after onset). All currents were normalized to corresponding capacitance of the cell overexpressing hTRPM3. Each data point is the mean of 8-14 cells with the error bar showing SEM, at the indicated  $pH_i$ . (f) Mean ratio of the peak current after onset to the current 80 seconds after onset (mean  $\pm$  SEM, n = 8-14 cells). "n.s." indicates not statistically significant among groups by one-way ANOVA with Tukey's post hoc multiple comparison.

**Figure 7** Changes of protons sensitivity of TRPM3 mutants. (a) Schematic of TRPM3 structure and the substituted amino acid residues in the putative pore region of hTRPM3. (b) Time course and representative recordings of TRPM3 mutants and wild-type currents elicited by voltage ramps ranging -100 to +100 mV, at the indicated  $pH_o$ . Bar graphs show mean outward and inward current amplitudes at the indicated  $pH_o$  (mean  $\pm$  SEM, n = 7-12 cells) Internal solution had a constant pH of 7.20 for all the recordings. (c) Ratio of outward current amplitudes at  $pH_o$  5.5 and  $pH_o$  7.4, of TRPM3 mutants and WT control. To obtain these ratios, current elicited by +100mV at  $pH_o$  5.5 was divided by the current elicited by +100mV at  $pH_o$  7.4 of the same cell (n = 7-12 cells). P values, comparing each group with WT-TRPM3, \* indicates  $p < 0.05$  by unpaired Student's t-test; "n.s." indicates not statistically significant.

**Supplementary Figure 1** Concentration-dependent effects of NH<sub>4</sub>Cl on TRPM3 current. (a) Time course and representative recordings of TRPM3 current by ramp protocols ranging from -100 mV to +100 mV at the indicated NH<sub>4</sub>Cl concentrations. The pH<sub>i</sub> was 6.0 in all recordings. Individual transfected cells were exposed to NH<sub>4</sub>Cl only once. (b) The comparison of effects of NH<sub>4</sub>Cl on TRPM3 currents in “gradient” (Fig.4) and “individual” (a) recordings. The increase in outward current in response to NH<sub>4</sub>Cl is presented as the percentage increase in outward current from the same cell without NH<sub>4</sub>Cl. Both data suggest that NH<sub>4</sub>Cl potentiate both TRPM3 inward and outward currents. The average data are mean ± SEM, n = 11-20 cells.

# Fig.1

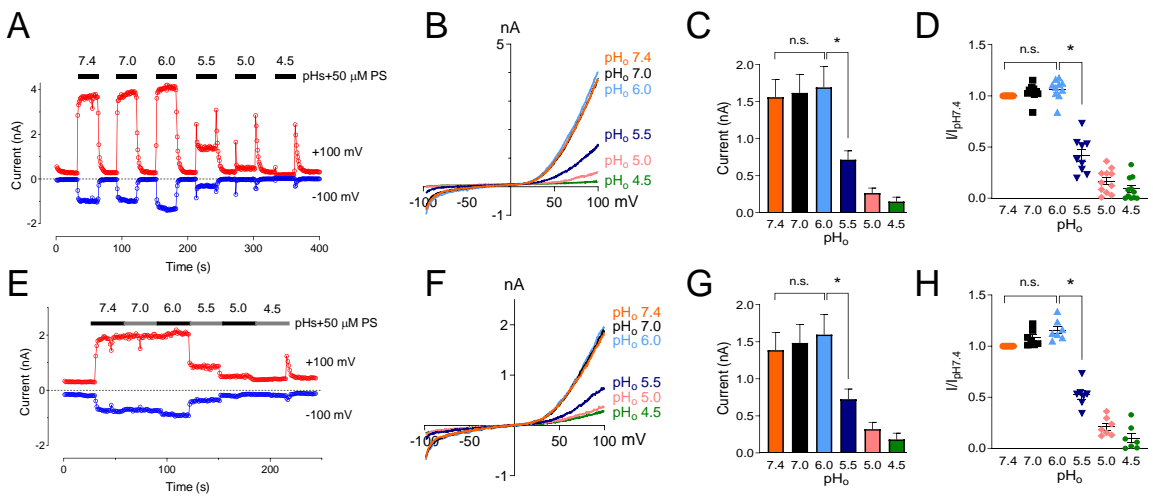

# Fig.2

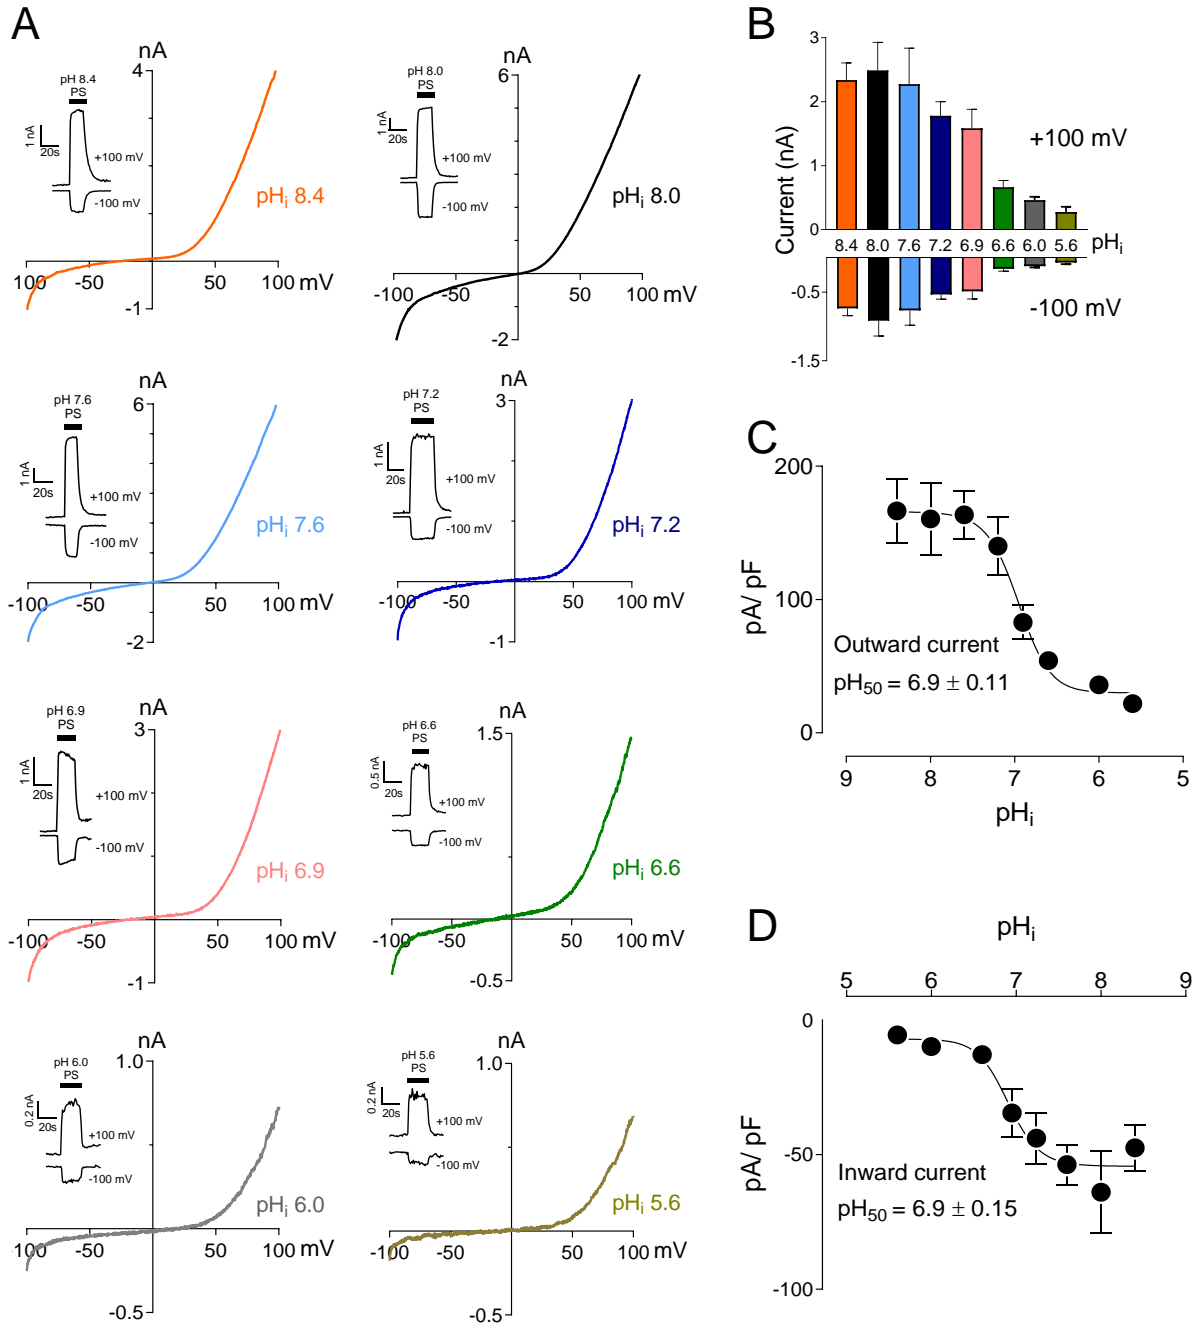

# Fig.3

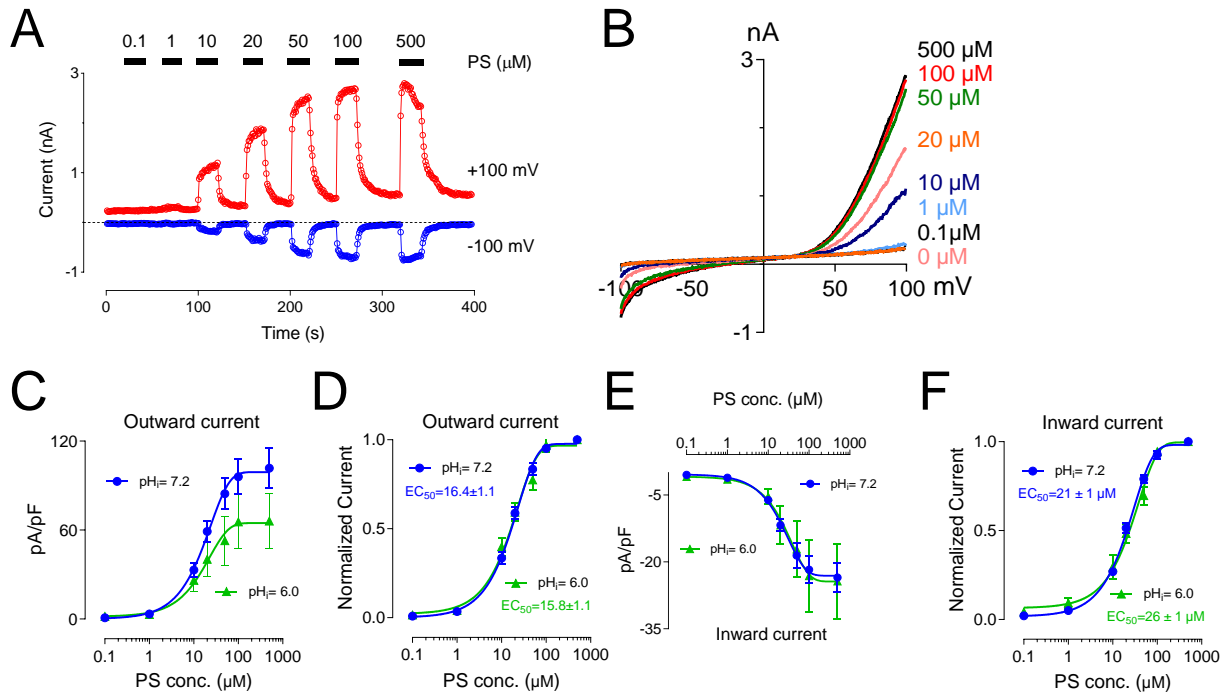

# Fig.4

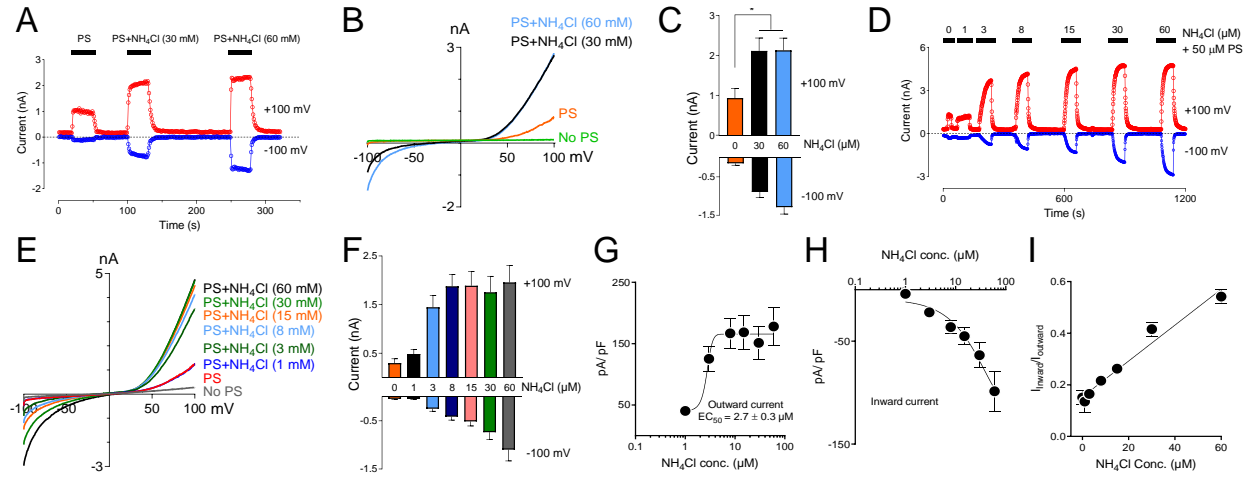

## Fig.5

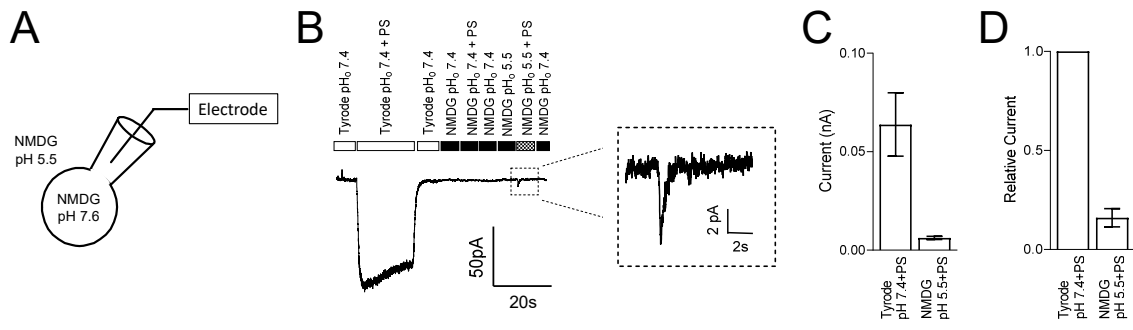

# Fig.6

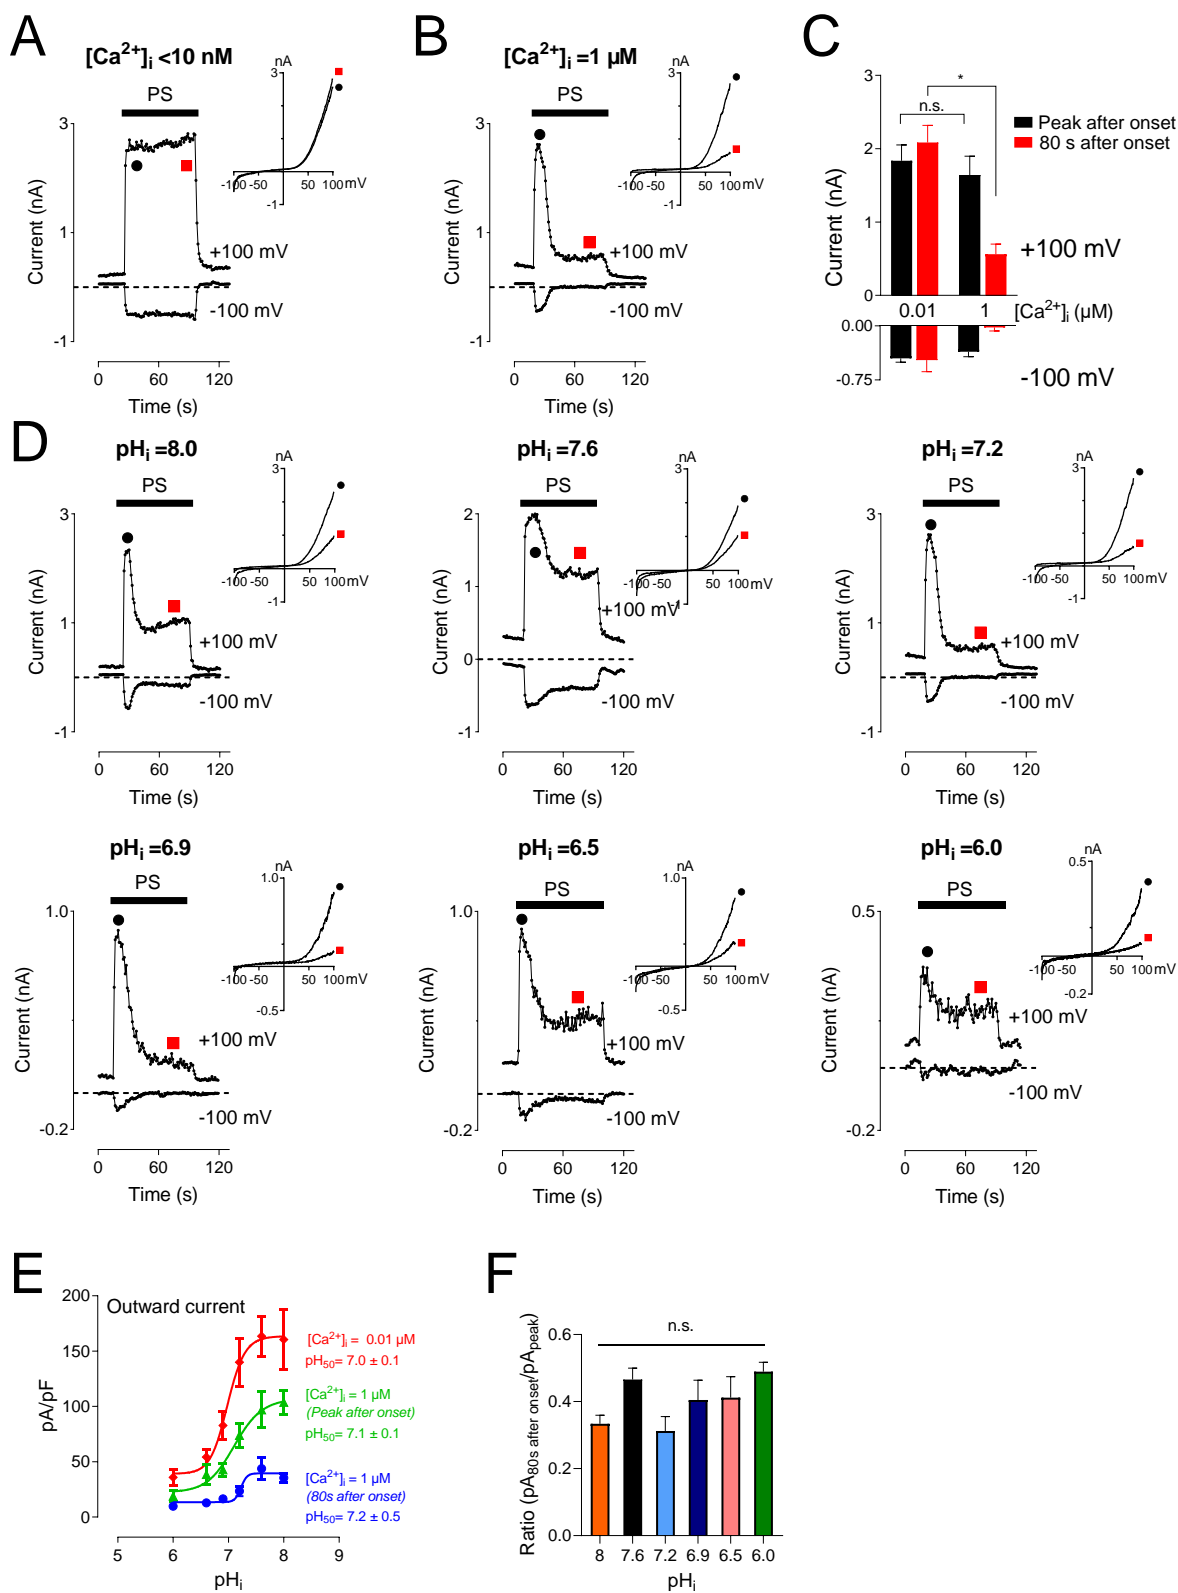



**Fig.7**

**A**

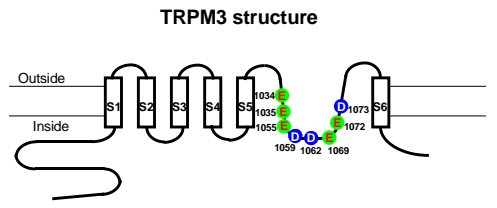

**C**

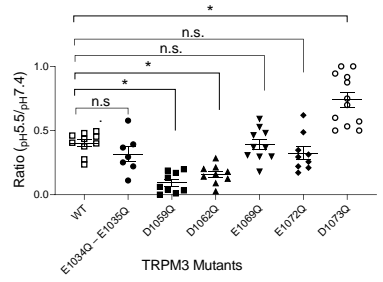

**B**

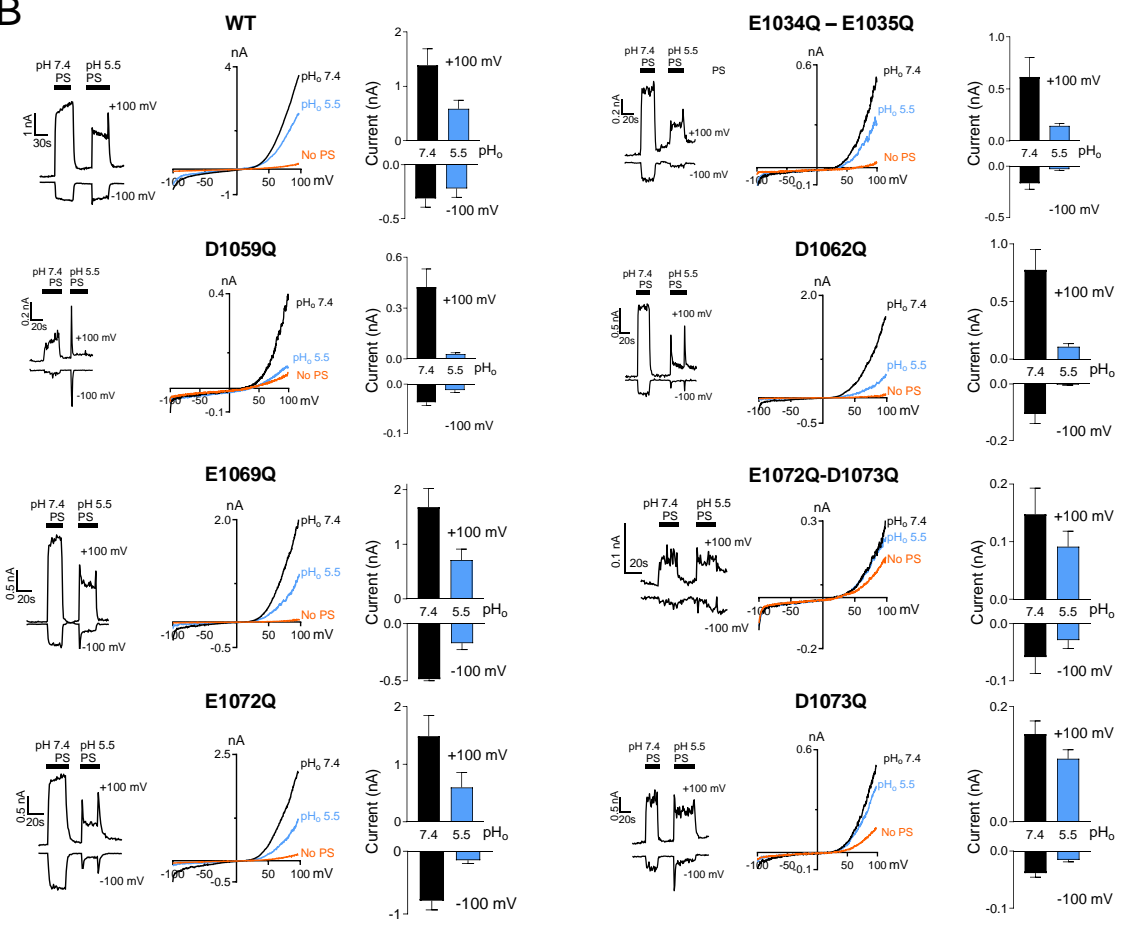

# sFig.1

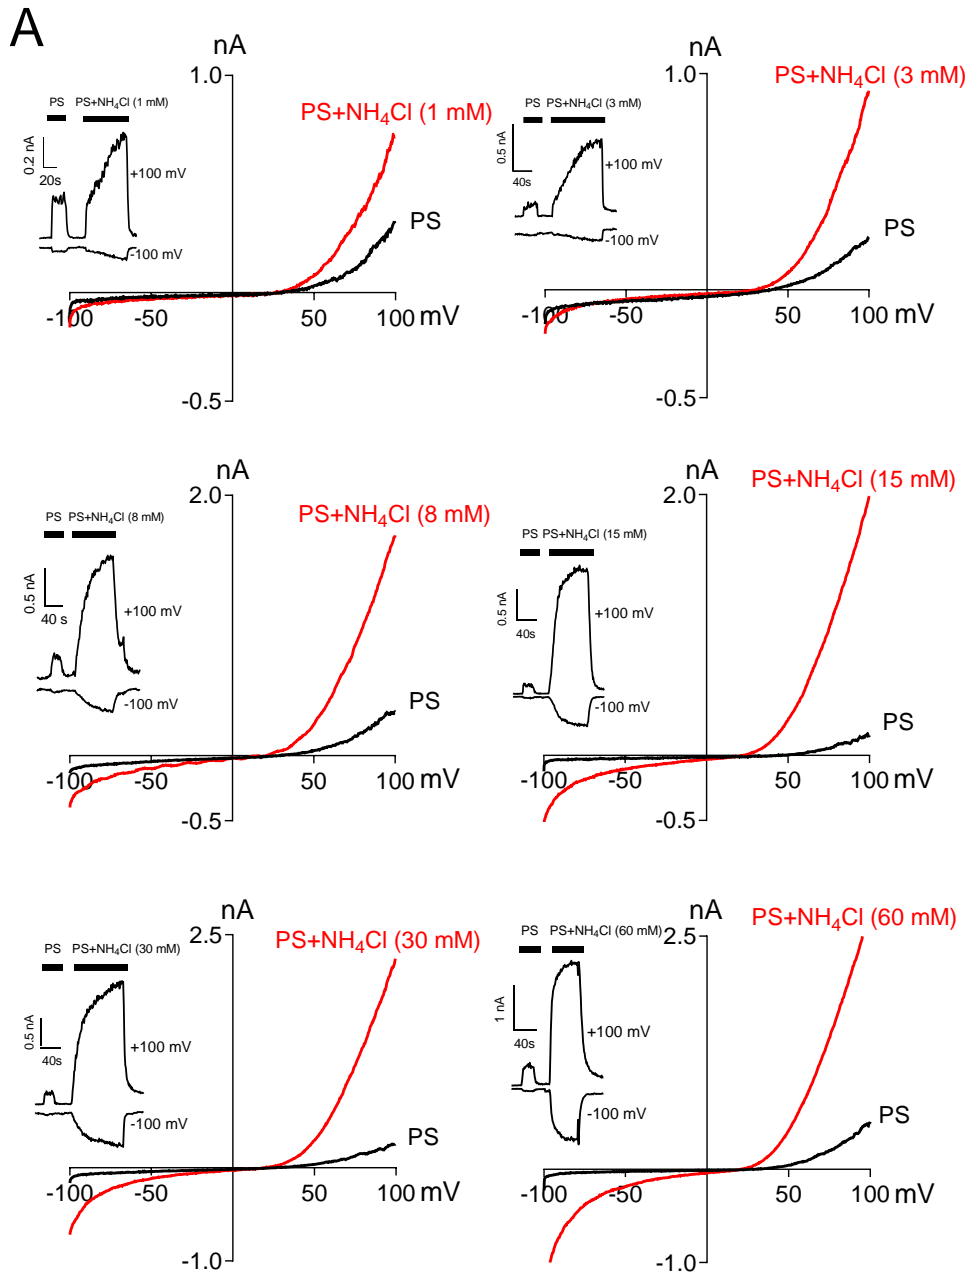

## B

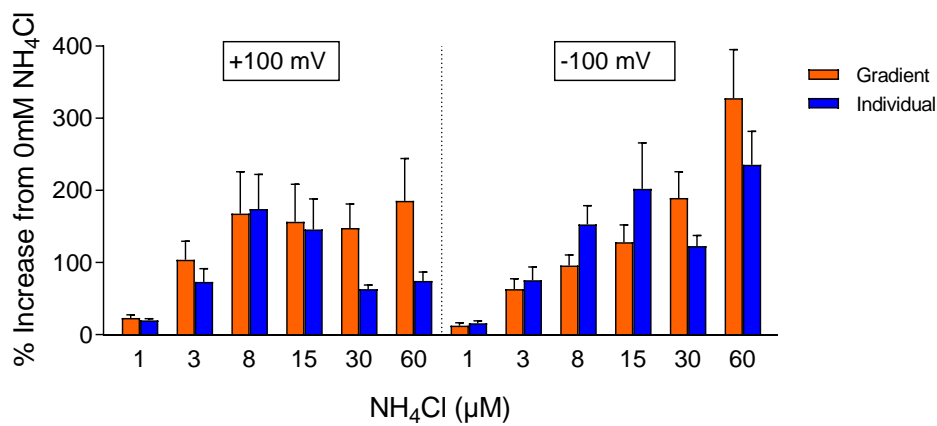

Source: https://www.biorxiv.org/content/biorxiv/early/2020/10/08/2020.10.08.331454.full.pdf
